# Supplementary material for: Integrative Analyses Reveal the Anticancer Mechanisms and Sensitivity Markers of the Next-Generation Hypomethylating Agent NTX-301
Source: MDPI journal article supplement (doi:10.3390/cancers15061737), 2023-03-13
Supplement: s1 [file s1]

## Supplementary Figures and Legends

### Integrative analyses reveal the anticancer mechanisms and sensitivity markers of the next-generation hypomethylating agent NTX-301

Supplementary Figure S1

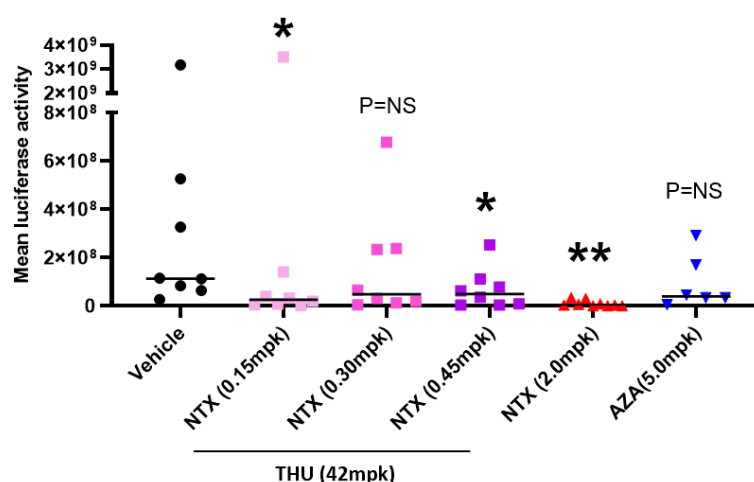

**Supplementary Figure S1.** Comparison of the efficacies of NTX-301, NTX-301+THU, and AZA in vivo. In NOD/SCID mice transplanted with luciferase-labeled MV4-11 cells (n=8 per group), luciferase activities for tumor growth were measured by the quantification of bioluminescence emission (photons/sec) upon treatment with NTX-301+THU (0.15, 0.30, and 0.45 mg/kg p.o. + 42.0 mg/kg), NTX-301 (2.0 mg/kg p.o.), or AZA (5.0 mg/kg i.p.). **Fig. 3** is an unpublished part of a previous mouse study (Blood Cancer J. 2022 Apr 11;12(4):57. doi: 10.1038/s41408-022-00664-y), and **Supplementary Figure S1** represents a combination of the data shown in **Fig. 3** of this manuscript and data from the previous mouse study to directly compare the treatments. *P*

values (vs. vehicle) are specified and marked as follows: \*,  $p < 0.05$ ; \*\*,  $p < 0.001$ ; NS, not significant. AZA, azacitidine; p.o., oral administration; i.p., intraperitoneal administration; THU, tetrahydrouridine.

## Supplementary Figure S2

### MV4-11 (p53 WT)

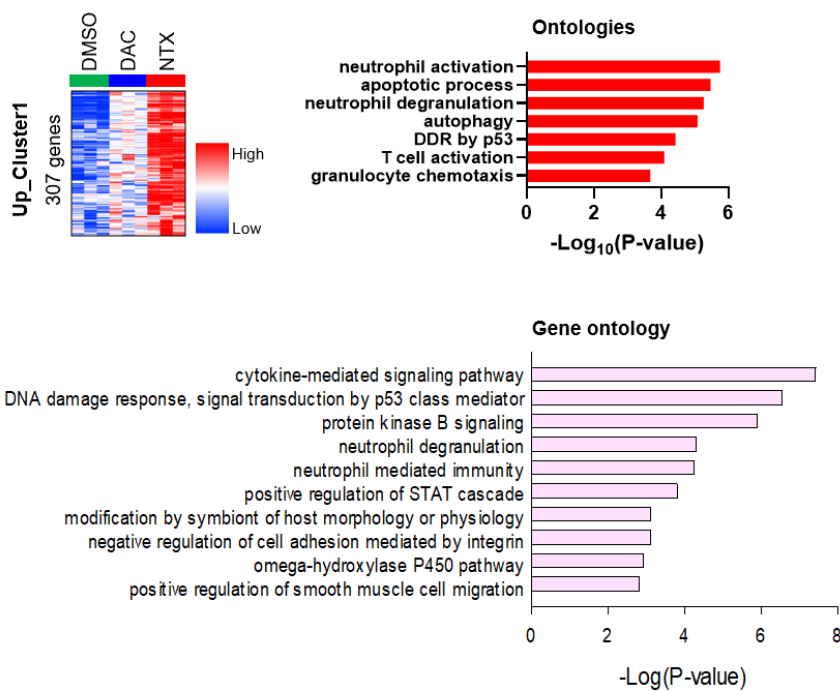

### HL-60 (p53 null)

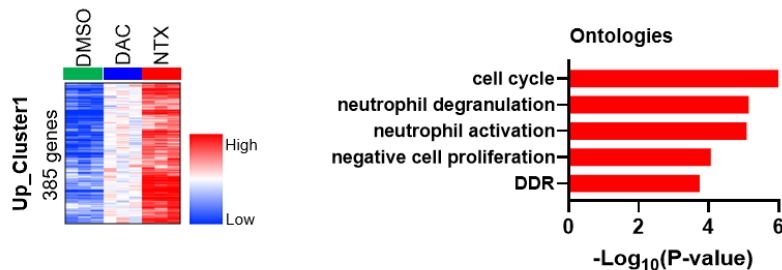

**Supplementary Figure S2.** Heatmaps showing gene sets that were more strongly upregulated (Up\_cluster) by NTX-301 than by DAC in MV4-11 (top) and HL-60

(bottom) cells and bar plots showing the results of Gene Ontology analysis investigating the biological features of each gene set.

**Supplementary Figure S3**

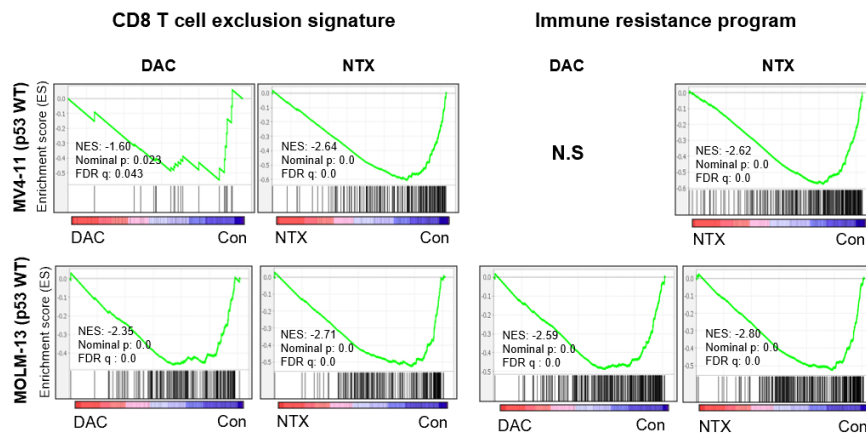

**Supplementary Figure S3.** Transcriptome analysis revealed NTX-301-induced transcriptional reprogramming in AML cells. GSEA plots show significant enrichment of two signatures, which are associated with immunotherapy resistance (CD8 T cell exclusion signature and immune resistance program), among the transcriptomic changes induced by NTX-301 or DAC in MV4-11 and MOLM-13 cells. A GSEA plot showing statistical insignificance (N.S.) is omitted.

**Supplementary Figure S4**

**Upregulated DEGs**

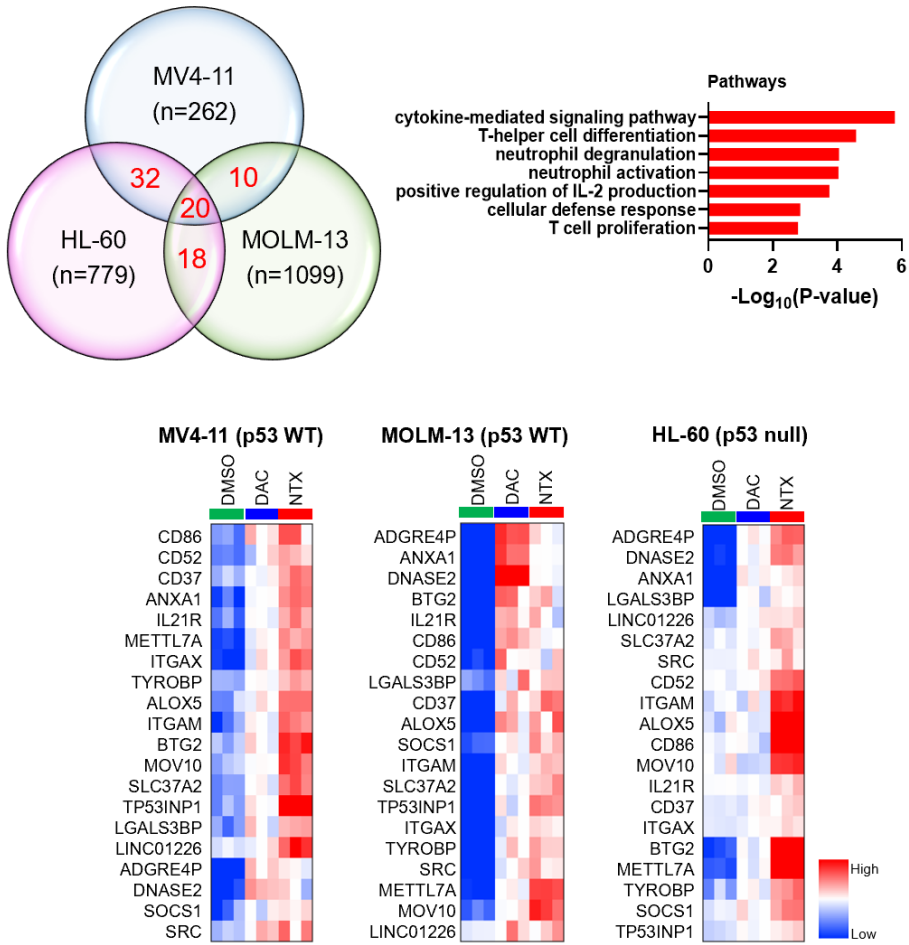

**Supplementary Figure S4.** Identification of 20 genes that were commonly upregulated by NTX-301 in three AML cell lines, namely, the MV4-11, HL-60, and MOLM-13 cell lines. The Venn diagram and heatmaps show the 20 genes, and the bar plot shows biological pathways with which the genes are significantly associated.

**Supplementary Figure S5**

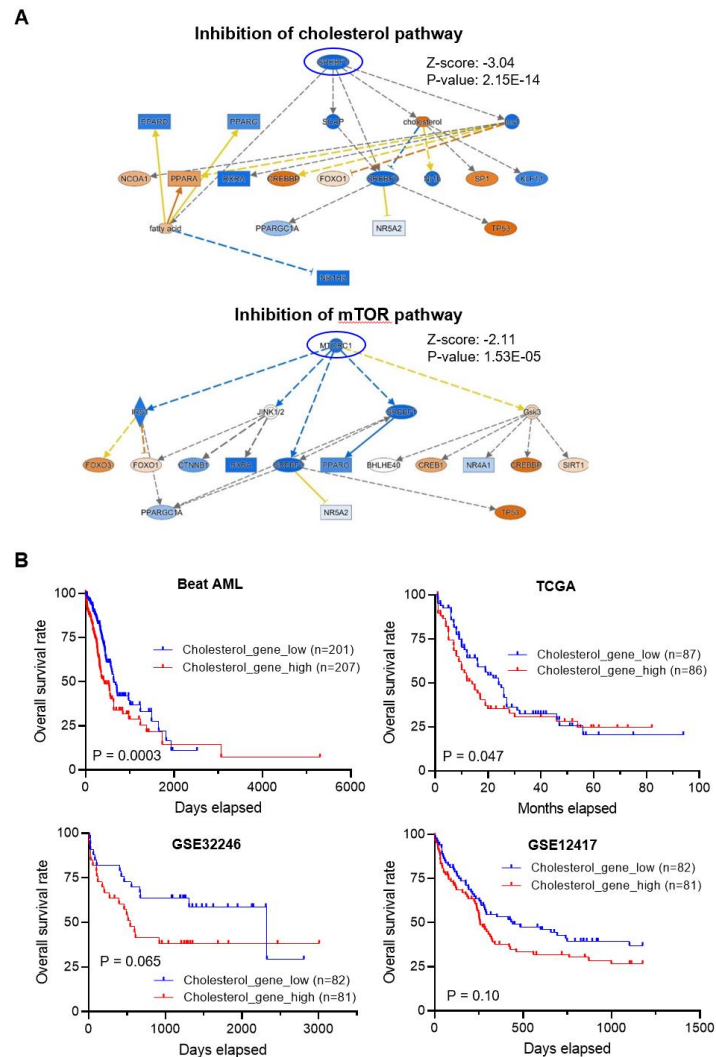

**Supplementary Figure S5.** Gene set enrichment analysis using genes that were downregulated by NTX-301 revealed the involvement of cholesterol biosynthesis and the mTOR pathway and showed the clinical benefit of these MoAs. **A**, IPA highlighting the inhibition of SREBF1/2 and mTORC1/2, which were predicted to be upstream regulators of the downregulated genes. Z scores and *p* values are shown. **B**, Kaplan–Meier curves showing that the cholesterol biosynthesis-related genes that were downregulated by NTX-301 treatment are significantly associated with the overall survival of AML patients in four cohorts (Beat AML, TCGA, GSE32246, and

GSE12417). The log-rank  $P$  values are shown.

**Supplementary Figure S6**

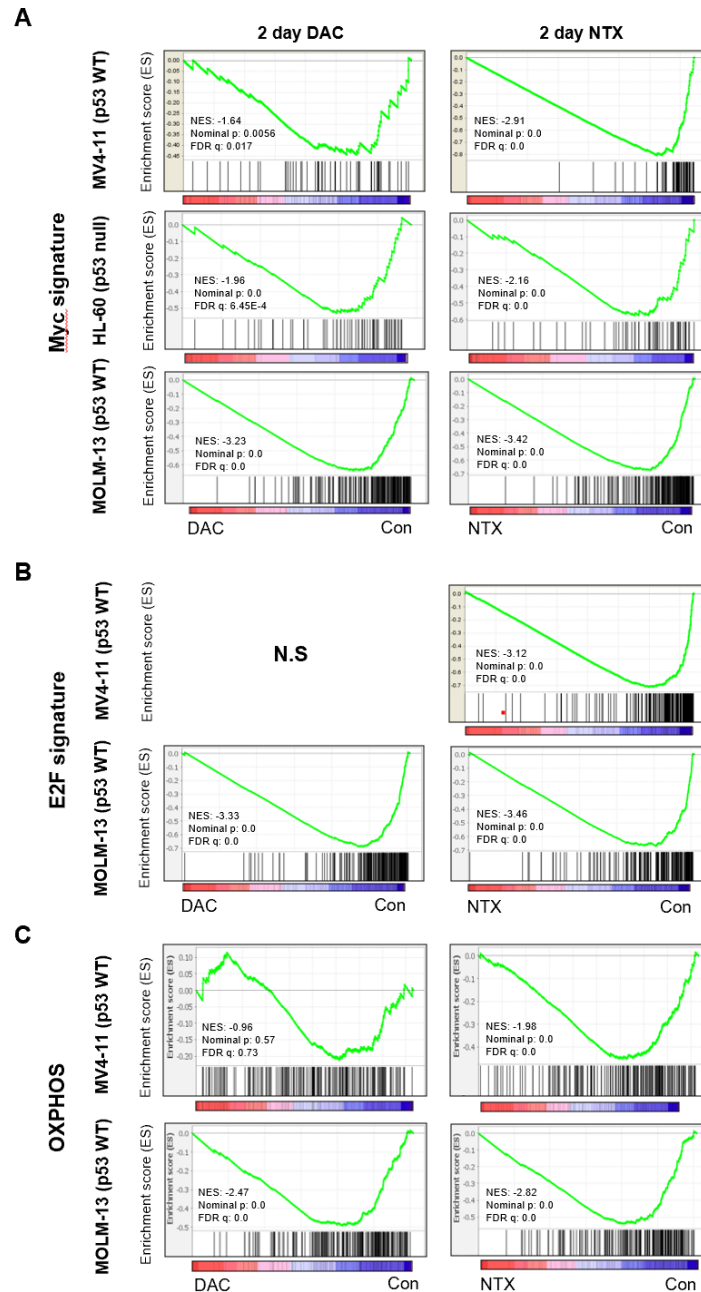

**Supplementary Figure S6.** Transcriptome analysis reveals that NTX-301 suppresses transcriptional programs that are associated with oncogenic activity in AML. **A-C**, GSEA plots showing significant enrichment of Myc (**A**), E2F (**B**), and oxidative phosphorylation (OXPHOS) signatures (**C**) among the changes in the transcriptome

induced by NTX-301 or DAC in MV4-11, HL-60, and MOLM-13 cells. A GSEA plot showing statistical insignificance (N.S.) is omitted.

**Supplementary Figure S7**

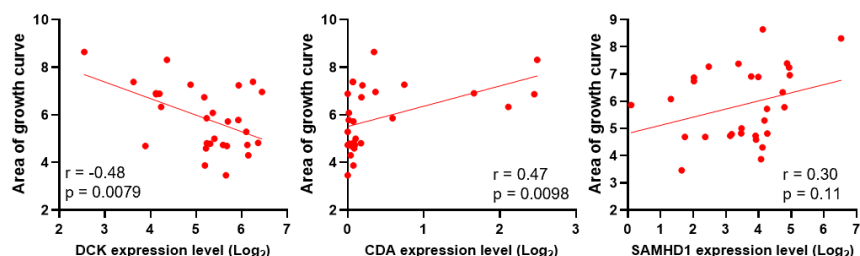

**Supplementary Figure S7.** Transcriptome data revealed correlations between the efficacy of NTX-301 and the expression levels of genes that are involved in HMA metabolism (*DCK* and *CDA*) and triphosphohydrolase activity (*SAMHD1*). The scatter plots show correlations between the expression levels of *DCK*, *CDA*, and *SAMHD1* and AUC values in blood CCLs after NTX-301 treatment. Correlation coefficients ( $r$ ) and  $p$  values are shown.

**Supplementary Figure S8**

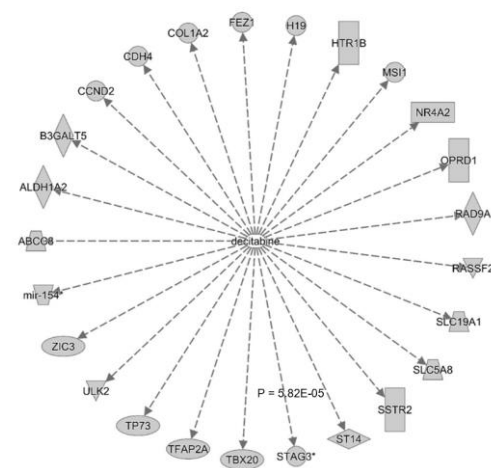

**Supplementary Figure S8.** IPA shows the significant enrichment of DAC-regulated genes among the downstream genes of DMR352. The  $P$  value is shown.
