# Supplementary material for: Integrative Analyses Reveal the Anticancer Mechanisms and Sensitivity Markers of the Next-Generation Hypomethylating Agent NTX-301
Source: Cancers (Basel). 2023 Mar 13;15(6):1737. doi: 10.3390/cancers15061737 (PMC10046470; doi:10.3390/cancers15061737)
Supplement: Supplementary file 1 [file cancers-15-01737-s001.zip]

Archive with 4 entries (4 files):
- cancers-2262970-sup fig.pdf
- Supplementary_Table_S1.xlsx
- Supplementary_Table_S2.xlsx
- Supplementary_Table_S3.xlsx
