# Supplementary material for: Integrative Analyses Reveal the Anticancer Mechanisms and Sensitivity Markers of the Next-Generation Hypomethylating Agent NTX-301
Source: Cancers (Basel). 2023 Mar 13;15(6):1737. doi: 10.3390/cancers15061737 (PMC10046470; doi:10.3390/cancers15061737)
Supplement: Supplementary file 1 [file cancers-15-01737-s001.zip › Supplementary_Table_S1.xlsx]

## Sheet: Sheet1
Supple. Table S1. The viability of 199 CCLs upon NTX-301 treatment that was examined based on two sensitivity metrics, the IC50 and the area under the dose-response curve (AUC).
Cell_line	TISSUE	IC50 (uM)	AUC
BV173	Blood	0.00532	3.46
NAMALWA	Blood	0.0109	3.87
SUDHL4	Blood	0.0175	4.3
MOLT16	Blood	0.0182	4.59
RS411	Blood	0.0203	4.69
NALM6	Blood	0.0338	4.69
MC116	Blood	0.0297	4.73
CA46	Blood	0.0255	4.73
GA10	Blood	0.0335	4.79
NUDUL1	Blood	0.0245	4.81
SUDHL10	Blood	0.0366	4.82
PA1	Female GU	0.0392	4.89
MHHPREB1	Blood	0.0389	4.9
JEKO1	Blood	0.0385	5
NTERA2CLD1	Testis	0.0427	5.12
SUDHL8	Blood	0.0706	5.29
769P	Kidney	0.0657	5.37
A427	Lung	0.0775	5.4
A498	Kidney	0.0738	5.42
AGS	Stomach	0.0584	5.47
COLO205	Colon	0.0811	5.49
MOLT4	Blood	0.035	5.54
DETROIT562	H&N	0.0811	5.55
CAKI2	Kidney	0.0856	5.56
SCC25	H&N	0.126	5.58
D283MED	CNS	0.0688	5.62
CORL23	Lung	0.0944	5.62
COLO320	Colon	0.0923	5.66
RAJI	Blood	0.0752	5.72
DB	Blood	0.135	5.78
HUCCT1	Liver	0.105	5.81
DLD1	Colon	0.221	5.82
A375	Skin	0.0667	5.83
JURKAT	Blood	0.0695	5.86
HCT116	Colon	0.1	5.87
HT1080	S&C	0.12	5.89
MDAMB231	Breast	0.21	5.9
BFTC905	Bladder	0.119	5.94
CGTHW1	Endocrine	0.143	5.95
JRT3T35	Blood	0.106	5.96
NCIH292	Lung	0.194	6.01
SW1463	Colon	0.303	6.02
CALU6	Lung	0.289	6.04
MESSA	S&C	0.135	6.05
CMLT1	Blood	0.109	6.08
A204	S&C	0.157	6.1
SNB19	CNS	0.17	6.1
JAR	Placenta	0.296	6.11
CCRFCEM	Blood	0.119	6.14
H4	CNS	0.0801	6.2
OE21	H&N	0.152	6.21
A549	Lung	0.19	6.21
A431	Skin	0.256	6.24
OE33	H&N	0.161	6.25
5637	Bladder	0.296	6.26
A388	Skin	0.19	6.28
FADU	H&N	0.208	6.28
SCABER	Bladder	0.187	6.3
HUPT4	Pancreas	0.321	6.31
PSN1	Pancreas	0.191	6.32
MV411	Blood	0.183	6.33
SW982	S&C	0.171	6.35
ACHN	Kidney	0.231	6.36
WIDR	Colon	0.263	6.36
PC3	Prostate	0.441	6.43
VAESBJ	S&C	0.241	6.44
786O	Kidney	0.249	6.47
BHT101	Endocrine	0.235	6.51
H9	Blood	0.468	6.53
SJRH30	S&C	0.291	6.57
KHOS240S	Bone	0.254	6.57
SKUT1	S&C	0.343	6.59
CAKI2	Kidney	0.363	6.6
SU8686	Pancreas	0.508	6.6
SW620	Colon	0.234	6.61
HT29	Colon	0.323	6.63
LS411N	Colon	0.265	6.63
BC1	Blood	0.338	6.69
CAL27	H&N	0.319	6.72
NCIH747	Colon	0.319	6.74
KG1	Blood	0.461	6.74
BE(2)C	CNS	0.373	6.76
DU145	Prostate	0.432	6.78
UMUC3	Bladder	0.289	6.78
647V	Bladder	0.408	6.83
HS746T	Stomach	0.666	6.83
SW837	Colon	0.354	6.83
HS936T	Skin	0.398	6.86
HL60	Blood	0.514	6.87
RPMI7951	Skin	0.527	6.88
L428	Blood	0.365	6.89
SKMES1	Lung	0.314	6.91
EM2	Blood	0.255	6.91
ARH77	Blood	0.413	6.93
C4II	Female GU	0.773	6.96
DAUDI	Blood	0.451	6.96
HPAFII	Pancreas	0.737	6.96
A253	H&N	0.601	6.98
U87MG	CNS	1.64	6.99
NCIH508	Colon	0.542	7.01
C33A	Female GU	0.497	7.02
WM2664	Skin	0.429	7.07
HT3	Female GU	0.818	7.07
SW403	Colon	0.619	7.07
RL952	Female GU	0.705	7.1
SH4	Skin	0.698	7.17
KATOIII	Stomach	0.807	7.17
SKPNDW	S&C	0.847	7.19
EFM19	Breast	3.95	7.22
A673	S&C	0.698	7.23
DOHH2	Blood	0.609	7.24
SW872	S&C	0.73	7.26
SW579	Endocrine	1.05	7.26
TF1	Blood	0.733	7.27
MIAPACA2	Pancreas	0.881	7.33
NCIH441	Lung	1.3	7.34
A172	CNS	10	7.35
G361	Skin	1.08	7.36
BXPC3	Pancreas	0.699	7.38
MEG01	Blood	1.07	7.38
MG63	Bone	0.99	7.38
SKMEL3	Skin	0.522	7.39
HT	Blood	1.03	7.39
HCT15	Colon	1.02	7.41
IM9	Blood	1.05	7.45
C32	Skin	0.953	7.47
HELA	Female GU	1.81	7.47
HEPG2	Liver	0.892	7.47
MeWo	Skin	1.04	7.47
RPMI6666	Blood	1.05	7.49
SW480	Colon	1.58	7.52
TCCSUP	Bladder	1.18	7.53
A7	Skin	1.19	7.53
SCC9	H&N	1.83	7.58
NCIH446	Lung	3.04	7.59
SW900	Lung	1.98	7.6
MDAMB468	Breast	1.34	7.62
J82	Bladder	1.98	7.63
CHAGOK1	Lung	3.41	7.67
T98G	CNS	1.39	7.69
HT1197	Bladder	7.13	7.71
CORL105	Lung	2.24	7.72
SKO007	Blood	4.29	7.74
SKNFI	CNS	2.71	7.76
SKNAS	CNS	1.17	7.77
YAPC	Pancreas	1.05	7.79
T24	Bladder	1.53	7.82
DMS114	Lung	2.2	7.83
639V	Bladder	1.57	7.84
CAPAN1	Pancreas	3.32	7.85
LS1034	Colon	1.41	7.91
MDAMB453	Breast	1.89	7.93
SCC4	H&N	2.86	7.93
MALME3M	Skin	7.45	7.94
HT1376	Bladder	3.28	7.95
ASPC1	Pancreas	2.12	8.02
DAOY	CNS	3.61	8.02
CFPAC1	Pancreas	1.75	8.03
DMS53	Lung	4.22	8.06
SKBR3	Breast	9.32	8.06
NIHOVCAR3	Female GU	3.44	8.08
22RV1	Prostate	2.71	8.09
DBTRG05MG	CNS	10	8.12
HS766T	Pancreas	9.4	8.2
SKMEL28	Skin	2.5	8.26
THP1	Blood	5.12	8.31
U138MG	CNS	10	8.32
C32	Skin	10	8.33
MCF7	Breast	6.47	8.39
SKOV3	Female GU	2.92	8.4
DMS273	Lung	5.66	8.41
BM1604	Prostate	4.41	8.43
EB2	Blood	8.19	8.48
OE19	H&N	10	8.58
SKNEP1	Kidney	10	8.58
SW1417	Colon	10	8.59
BT20	Breast	10	8.62
PFSK1	CNS	7.61	8.64
RPMI8226	Blood	3.27	8.64
HS578T	Breast	10	8.65
LS174T	Colon	10	8.68
CAMA1	Breast	10	8.72
HS852T	Skin	10	8.75
BT474	Breast	10	8.77
AU565	Breast	10	8.78
T47D	Breast	10	8.78
ZR751	Breast	10	8.81
MS751	Female GU	10	8.85
U118MG	CNS	10	8.89
NCIH295R	Endocrine	10	8.93
HS688AT	Skin	10	8.93
TT	Endocrine	10	8.98
HS729	S&C	10	9.08
A704	Kidney	10	9.1
NCIH69	Lung	10	9.12
HS821T	S&C	10	9.25
MDAMB415	Breast	10	9.35
DKMG	CNS	10	9.5
SW962	Female GU	10	9.6
