# Supplementary material for: Integrative Analyses Reveal the Anticancer Mechanisms and Sensitivity Markers of the Next-Generation Hypomethylating Agent NTX-301
Source: Cancers (Basel). 2023 Mar 13;15(6):1737. doi: 10.3390/cancers15061737 (PMC10046470; doi:10.3390/cancers15061737)
Supplement: Supplementary file 1 [file cancers-15-01737-s001.zip › Supplementary_Table_S2.xlsx]

## Sheet: Sheet1
Supple. Table S2. Transcriptional events associated with sensitivity to NTX-301.
EntrezID	Symbol	Gene_Name	logFC	AveExpr	t	P.Value	adj.P.Val
9854	C2CD2L	C2CD2 like	0.844041	3.096	5.92847	1.68518e-08	0.000150194
1635	DCTD	dCMP deaminase	-0.75425	6.01224	-5.90303	1.91512e-08	0.000150194
200916	RPL22L1	ribosomal protein L22 like 1	-1.36274	6.915	-5.73859	4.34348e-08	0.000226145
28987	NOB1	NIN1 (RPN12) binding protein 1 homolog	-0.668553	5.89221	-5.64822	6.77065e-08	0.000226145
1716	DGUOK	deoxyguanosine kinase	-0.472976	6.35681	-5.63538	7.20896e-08	0.000226145
8503	PIK3R3	phosphoinositide-3-kinase regulatory subunit 3	1.31075	2.82567	5.5252	1.23015e-07	0.000321582
9935	MAFB	MAF bZIP transcription factor B	1.21268	0.890838	5.42867	1.9539e-07	0.000361687
283212	KLHL35	kelch like family member 35	1.13475	1.15372	5.4274	1.96584e-07	0.000361687
8091	HMGA2	high mobility group AT-hook 2	-2.18028	3.30774	-5.41601	2.07535e-07	0.000361687
7227	TRPS1	transcriptional repressor GATA binding 1	1.56449	2.04889	5.34205	2.94637e-07	0.000462138
10360	NPM3	nucleophosmin/nucleoplasmin 3	-0.842138	6.09239	-5.21085	5.44339e-07	0.00075504
25902	MTHFD1L	methylenetetrahydrofolate dehydrogenase (NADP+ dependent) 1 like	-0.829671	4.93134	-5.18049	6.26539e-07	0.00075504
100131211	NEMP2	nuclear envelope integral membrane protein 2	-0.725382	2.67656	-5.16385	6.76581e-07	0.00075504
23139	MAST2	microtubule associated serine/threonine kinase 2	0.658109	4.42616	5.15891	6.92165e-07	0.00075504
116211	TM4SF19	transmembrane 4 L six family member 19	-1.54873	1.36654	-5.14772	7.28765e-07	0.00075504
1615	DARS	aspartyl-tRNA synthetase	-0.513816	5.96731	-5.13134	7.85764e-07	0.00075504
51380	CSAD	cysteine sulfinic acid decarboxylase	0.873874	3.90925	5.1225	8.18341e-07	0.00075504
151188	ARL6IP6	ADP ribosylation factor like GTPase 6 interacting protein 6	-0.597092	4.53185	-5.06953	1.0426e-06	0.000908507
8795	TNFRSF10B	TNF receptor superfamily member 10b	-1.24118	5.3867	-5.05688	1.10441e-06	0.000911716
64210	MMS19	MMS19 homolog, cytosolic iron-sulfur assembly component	-0.426626	5.43505	-4.94221	1.85322e-06	0.00145338
30011	SH3KBP1	SH3 domain containing kinase binding protein 1	-1.33769	4.69076	-4.91184	2.1226e-06	0.00155546
355	FAS	Fas cell surface death receptor	-1.40899	2.98874	-4.89719	2.26577e-06	0.00155546
7098	TLR3	toll like receptor 3	-0.889288	1.13654	-4.8957	2.28088e-06	0.00155546
10539	GLRX3	glutaredoxin 3	-0.551358	6.60596	-4.8571	2.70706e-06	0.00176917
10912	GADD45G	growth arrest and DNA damage inducible gamma	1.02511	1.06585	4.78872	3.65861e-06	0.00229541
163059	ZNF433	zinc finger protein 433	0.811722	1.50893	4.76686	4.02595e-06	0.00242873
8991	SELENBP1	selenium binding protein 1	2.02566	2.51486	4.75798	4.18513e-06	0.00243125
51076	CUTC	cutC copper transporter	-0.579548	4.60694	-4.72884	4.7513e-06	0.00260297
374900	ZNF568	zinc finger protein 568	0.998378	1.33349	4.72589	4.81262e-06	0.00260297
11094	CACFD1	calcium channel flower domain containing 1	0.818388	2.7245	4.7161	5.02169e-06	0.00260852
23173	METAP1	methionyl aminopeptidase 1	-0.436422	5.48742	-4.71003	5.15551e-06	0.00260852
55219	MACO1	macoilin 1	0.472348	3.51771	4.6818	5.82486e-06	0.00281326
55108	BSDC1	BSD domain containing 1	0.415799	4.8509	4.67809	5.91889e-06	0.00281326
10575	CCT4	chaperonin containing TCP1 subunit 4	-0.427447	7.33017	-4.6655	6.24893e-06	0.00284916
3038	HAS3	hyaluronan synthase 3	-1.57552	2.2516	-4.6601	6.39572e-06	0.00284916
5223	PGAM1	phosphoglycerate mutase 1	-0.601893	8.63311	-4.65151	6.63642e-06	0.00284916
9532	BAG2	BCL2 associated athanogene 2	-0.916265	2.67011	-4.64856	6.72099e-06	0.00284916
27350	APOBEC3C	apolipoprotein B mRNA editing enzyme catalytic subunit 3C	-1.46727	4.10004	-4.64111	6.93937e-06	0.00286432
100506144	TMEM35B	transmembrane protein 35B	-0.85861	4.35984	-4.63291	7.1876e-06	0.0028907
1643	DDB2	damage specific DNA binding protein 2	-0.872837	5.18991	-4.61858	7.64211e-06	0.00299666
124961	ZFP3	ZFP3 zinc finger protein	0.763902	0.964169	4.6001	8.26953e-06	0.0031636
19	ABCA1	ATP binding cassette subfamily A member 1	-1.20111	1.61604	-4.58174	8.94192e-06	0.00333938
27124	INPP5J	inositol polyphosphate-5-phosphatase J	1.08755	1.39233	4.57294	9.28227e-06	0.00338587
79613	TANGO6	transport and golgi organization 6 homolog	-0.568159	2.62784	-4.5621	9.71903e-06	0.00346461
200558	APLF	aprataxin and PNKP like factor	-0.460867	1.01531	-4.54434	1.04777e-05	0.00365205
150	ADRA2A	adrenoceptor alpha 2A	0.754834	0.414191	4.5174	1.17389e-05	0.0040027
5297	PI4KA	phosphatidylinositol 4-kinase alpha	0.526142	4.90383	4.50732	1.22468e-05	0.00408706
100	ADA	adenosine deaminase	-1.10264	3.72931	-4.46937	1.43577e-05	0.00469167
10148	EBI3	Epstein-Barr virus induced 3	-0.874895	0.75933	-4.45242	1.54096e-05	0.00493265
4685	NCAM2	neural cell adhesion molecule 2	1.15328	0.864163	4.44472	1.59114e-05	0.00499141
117583	PARD3B	par-3 family cell polarity regulator beta	0.597089	1.03874	4.43388	1.66453e-05	0.00511924
7473	WNT3	Wnt family member 3	-0.663063	1.57543	-4.41306	1.81461e-05	0.00547349
51388	NIP7	nucleolar pre-rRNA processing protein NIP7	-0.488094	5.10767	-4.40287	1.89275e-05	0.00560147
24138	IFIT5	interferon induced protein with tetratricopeptide repeats 5	-0.804294	2.44098	-4.38348	2.05045e-05	0.00564946
116441	TM4SF18	transmembrane 4 L six family member 18	-1.64439	1.27431	-4.38139	2.06818e-05	0.00564946
5863	RGL2	ral guanine nucleotide dissociation stimulator like 2	0.721583	5.05847	4.37365	2.13511e-05	0.00564946
51611	DPH5	diphthamide biosynthesis 5	-0.489268	5.09922	-4.37357	2.13584e-05	0.00564946
9139	CBFA2T2	CBFA2/RUNX1 translocation partner 2	0.51379	3.08873	4.36982	2.16898e-05	0.00564946
8897	MTMR3	myotubularin related protein 3	0.475838	3.53084	4.36857	2.18016e-05	0.00564946
375287	RBM43	RNA binding motif protein 43	-0.627077	1.56658	-4.36851	2.18067e-05	0.00564946
84057	MND1	meiotic nuclear divisions 1	-0.704137	4.12338	-4.36669	2.19711e-05	0.00564946
5121	PCP4	Purkinje cell protein 4	1.2807	0.669502	4.35359	2.31847e-05	0.00586536
22822	PHLDA1	pleckstrin homology like domain family A member 1	-1.39315	4.36088	-4.3469	2.38286e-05	0.00593255
6926	TBX3	T-box 3	1.52984	2.3744	4.325	2.60605e-05	0.00626952
79023	NUP37	nucleoporin 37	-0.482932	5.74922	-4.32365	2.62051e-05	0.00626952
3488	IGFBP5	insulin like growth factor binding protein 5	2.26875	2.50031	4.31906	2.67001e-05	0.00626952
5618	PRLR	prolactin receptor	1.08096	0.709514	4.31832	2.67808e-05	0.00626952
7920	ABHD16A	abhydrolase domain containing 16A	0.458027	4.83652	4.30877	2.78426e-05	0.00635474
374899	ZNF829	zinc finger protein 829	0.625491	0.854053	4.30778	2.79552e-05	0.00635474
1459	CSNK2A2	casein kinase 2 alpha 2	-0.415164	5.20616	-4.29649	2.92677e-05	0.00655805
25989	ULK3	unc-51 like kinase 3	0.589386	4.64368	4.28481	3.06883e-05	0.00677952
10444	ZER1	zyg-11 related cell cycle regulator	0.483649	3.79319	4.27981	3.13165e-05	0.00682222
8464	SUPT3H	SPT3 homolog, SAGA and STAGA complex component	-0.677495	2.79844	-4.25556	3.45424e-05	0.00733599
56654	NPDC1	neural proliferation, differentiation and control 1	1.15345	4.69003	4.25201	3.50398e-05	0.00733599
4241	MELTF	melanotransferrin	-1.39718	3.66947	-4.25174	3.50781e-05	0.00733599
1857	DVL3	dishevelled segment polarity protein 3	0.423299	5.0931	4.24581	3.59258e-05	0.00741442
10257	ABCC4	ATP binding cassette subfamily C member 4	-1.02613	2.93509	-4.23833	3.70249e-05	0.00754202
84895	MIGA2	mitoguardin 2	0.43879	4.0576	4.21328	4.09408e-05	0.00822895
10612	TRIM3	tripartite motif containing 3	0.867911	3.46772	4.21021	4.14464e-05	0.00822895
1021	CDK6	cyclin dependent kinase 6	-1.06941	3.67526	-4.20253	4.27397e-05	0.00829781
79170	PRR15L	proline rich 15 like	1.51828	1.41628	4.19867	4.34036e-05	0.00829781
25988	HINFP	histone H4 transcription factor	0.469669	3.79028	4.19473	4.40925e-05	0.00829781
8925	HERC1	HECT and RLD domain containing E3 ubiquitin protein ligase family member 1	0.507246	4.55277	4.19181	4.461e-05	0.00829781
9701	PPP6R2	protein phosphatase 6 regulatory subunit 2	0.427108	4.74478	4.19156	4.46542e-05	0.00829781
10613	ERLIN1	ER lipid raft associated 1	-0.531162	5.1802	-4.1881	4.52745e-05	0.00829781
51752	ERAP1	endoplasmic reticulum aminopeptidase 1	-0.790322	4.12553	-4.18687	4.54964e-05	0.00829781
84142	ABRAXAS1	abraxas 1, BRCA1 A complex subunit	-0.631702	2.71537	-4.18164	4.6455e-05	0.00837525
8867	SYNJ1	synaptojanin 1	0.461645	2.35253	4.17239	4.81986e-05	0.00849792
80146	UXS1	UDP-glucuronate decarboxylase 1	-0.703549	5.29186	-4.17228	4.8219e-05	0.00849792
231	AKR1B1	aldo-keto reductase family 1 member B	-2.05313	6.37284	-4.16112	5.04048e-05	0.00868385
378884	NHLRC1	NHL repeat containing E3 ubiquitin protein ligase 1	0.721	0.971947	4.16067	5.04952e-05	0.00868385
128	ADH5	alcohol dehydrogenase 5 (class III), chi polypeptide	-0.494698	6.59068	-4.15848	5.09349e-05	0.00868385
1747	DLX3	distal-less homeobox 3	1.03573	0.921726	4.1507	5.25317e-05	0.00885978
57587	CFAP97	cilia and flagella associated protein 97	-0.52502	3.88943	-4.14498	5.37353e-05	0.00896636
54951	COMMD8	COMM domain containing 8	-0.518864	4.24187	-4.13631	5.561e-05	0.0091815
8061	FOSL1	FOS like 1, AP-1 transcription factor subunit	-1.83693	4.78823	-4.12833	5.73887e-05	0.00926792
8744	TNFSF9	TNF superfamily member 9	-1.17961	2.1988	-4.12617	5.78813e-05	0.00926792
284391	ZNF844	zinc finger protein 844	0.69454	0.957776	4.12606	5.7906e-05	0.00926792
147660	ZNF578	zinc finger protein 578	0.54644	0.422989	4.12211	5.88159e-05	0.00931845
1501	CTNND2	catenin delta 2	0.904958	0.560826	4.11722	5.99599e-05	0.00931977
56647	BCCIP	BRCA2 and CDKN1A interacting protein	-0.482063	6.26848	-4.117	6.00125e-05	0.00931977
84557	MAP1LC3A	microtubule associated protein 1 light chain 3 alpha	1.44741	2.30386	4.10358	6.32659e-05	0.00956589
113835	ZNF257	zinc finger protein 257	0.798734	0.744143	4.10131	6.38316e-05	0.00956589
5214	PFKP	phosphofructokinase, platelet	-0.933186	6.52938	-4.101	6.39088e-05	0.00956589
4790	NFKB1	nuclear factor kappa B subunit 1	-0.54007	4.27401	-4.10049	6.40369e-05	0.00956589
57103	TIGAR	TP53 induced glycolysis regulatory phosphatase	-0.771845	3.39732	-4.09311	6.59184e-05	0.00975406
26039	SS18L1	SS18L1 subunit of BAF chromatin remodeling complex	0.486565	3.83805	4.08861	6.70936e-05	0.00982114
10196	PRMT3	protein arginine methyltransferase 3	-0.489384	4.32331	-4.08578	6.78415e-05	0.00982114
56946	EMSY	EMSY transcriptional repressor, BRCA2 interacting	0.5512	3.82874	4.08424	6.82502e-05	0.00982114
537	ATP6AP1	ATPase H+ transporting accessory protein 1	0.605809	6.43677	4.08162	6.89545e-05	0.00983228
9266	CYTH2	cytohesin 2	0.434303	5.35103	4.07357	7.11606e-05	0.0100207
10742	RAI2	retinoic acid induced 2	0.561412	0.311325	4.07216	7.15538e-05	0.0100207
471	ATIC	5-aminoimidazole-4-carboxamide ribonucleotide formyltransferase/IMP cyclohydrolase	-0.398615	7.14983	-4.06475	7.36544e-05	0.0101868
22933	SIRT2	sirtuin 2	0.484558	4.57225	4.06342	7.40384e-05	0.0101868
55793	MINDY1	MINDY lysine 48 deubiquitinase 1	0.707414	2.91081	4.04702	7.89227e-05	0.0107644
55422	ZNF331	zinc finger protein 331	1.10668	2.8513	4.0361	8.23445e-05	0.0110576
57419	SLC24A3	solute carrier family 24 member 3	0.879641	0.510316	4.03556	8.25175e-05	0.0110576
57463	AMIGO1	adhesion molecule with Ig like domain 1	0.564206	1.20236	4.03347	8.31877e-05	0.0110576
55852	TEX2	testis expressed 2	0.555253	3.79284	4.03048	8.4158e-05	0.0110926
119392	SFR1	SWI5 dependent homologous recombination repair protein 1	-0.694697	3.23394	-4.02689	8.53368e-05	0.0111469
83879	CDCA7	cell division cycle associated 7	-1.04035	5.08318	-4.02492	8.59911e-05	0.0111469
11157	LSM6	LSM6 homolog, U6 small nuclear RNA and mRNA degradation associated	-0.458835	6.2927	-4.02078	8.73821e-05	0.0112343
84230	LRRC8C	leucine rich repeat containing 8 VRAC subunit C	-0.891083	1.8742	-4.01751	8.84962e-05	0.0112473
8722	CTSF	cathepsin F	1.36124	2.95599	4.01628	8.8917e-05	0.0112473
3735	KARS	lysyl-tRNA synthetase	-0.392317	7.04104	-4.01331	8.99457e-05	0.0112769
64777	RMND5B	required for meiotic nuclear division 5 homolog B	0.498685	4.6641	4.01146	9.05894e-05	0.0112769
142940	TRUB1	TruB pseudouridine synthase family member 1	-0.41522	3.93488	-3.99399	9.6906e-05	0.0119683
147686	ZNF418	zinc finger protein 418	0.800648	0.964895	3.99172	9.77572e-05	0.0119791
1760	DMPK	DM1 protein kinase	0.762733	4.43929	3.9781	0.000103016	0.0125016
64318	NOC3L	NOC3 like DNA replication regulator	-0.47211	3.95943	-3.97659	0.000103615	0.0125016
90333	ZNF468	zinc finger protein 468	0.802377	3.51481	3.97334	0.000104917	0.012562
55957	LIN37	lin-37 DREAM MuvB core complex component	0.432653	3.54482	3.96923	0.000106583	0.0126648
50626	CYHR1	cysteine and histidine rich 1	0.418792	5.28783	3.96404	0.000108728	0.0128225
282991	BLOC1S2	biogenesis of lysosomal organelles complex 1 subunit 2	-0.462511	5.48327	-3.9562	0.000112038	0.0131143
284371	ZNF841	zinc finger protein 841	0.738094	2.60922	3.95238	0.000113688	0.01315
7494	XBP1	X-box binding protein 1	0.984359	6.36835	3.94735	0.000115897	0.01315
55646	LYAR	Ly1 antibody reactive	-0.563057	5.24985	-3.94696	0.000116067	0.01315
57134	MAN1C1	mannosidase alpha class 1C member 1	0.757265	0.900879	3.94578	0.00011659	0.01315
27202	C5AR2	complement component 5a receptor 2	0.636323	0.426674	3.94234	0.000118134	0.01315
23523	CABIN1	calcineurin binding protein 1	0.454789	4.41113	3.94223	0.000118183	0.01315
9919	SEC16A	SEC16 homolog A, endoplasmic reticulum export factor	0.417336	5.32488	3.93961	0.00011937	0.01315
319089	TTC6	tetratricopeptide repeat domain 6	0.756089	0.645497	3.93899	0.000119654	0.01315
81688	C6orf62	chromosome 6 open reading frame 62	0.365564	5.88376	3.93651	0.000120791	0.01315
26268	FBXO9	F-box protein 9	0.372894	5.50319	3.9317	0.000123022	0.01315
92291	CAPN13	calpain 13	0.901295	0.56693	3.9284	0.000124578	0.01315
79339	OR51B4	olfactory receptor family 51 subfamily B member 4	-0.593852	0.331268	-3.92733	0.000125089	0.01315
2098	ESD	esterase D	-0.59643	6.57692	-3.92593	0.000125757	0.01315
84936	ZFYVE19	zinc finger FYVE-type containing 19	0.464643	4.47237	3.92349	0.00012693	0.01315
9528	TMEM59	transmembrane protein 59	0.530906	7.35561	3.92202	0.000127637	0.01315
2069	EREG	epiregulin	-1.79774	2.06702	-3.9219	0.0001277	0.01315
554251	FBXO48	F-box protein 48	-0.288015	0.851902	-3.92099	0.000128141	0.01315
145864	HAPLN3	hyaluronan and proteoglycan link protein 3	-1.02801	1.85469	-3.92085	0.00012821	0.01315
84083	ZRANB3	zinc finger RANBP2-type containing 3	-0.450953	2.35963	-3.91941	0.000128912	0.01315
5791	PTPRE	protein tyrosine phosphatase receptor type E	-0.927286	2.11745	-3.919	0.000129111	0.01315
7518	XRCC4	X-ray repair cross complementing 4	-0.532175	3.67536	-3.91667	0.000130262	0.0131817
79833	GEMIN6	gem nuclear organelle associated protein 6	-0.494119	3.94017	-3.91148	0.000132855	0.0133578
136895	C7orf31	chromosome 7 open reading frame 31	-0.560331	1.56022	-3.90423	0.000136557	0.0135187
55704	CCDC88A	coiled-coil domain containing 88A	-1.08607	3.89674	-3.90359	0.000136886	0.0135187
23268	DNMBP	dynamin binding protein	-0.857944	3.42689	-3.9033	0.00013704	0.0135187
11264	PXMP4	peroxisomal membrane protein 4	0.835813	2.82677	3.9004	0.000138549	0.0135821
57704	GBA2	glucosylceramidase beta 2	0.542963	5.23404	3.8972	0.00014024	0.0136073
197259	MLKL	mixed lineage kinase domain like pseudokinase	-0.906682	2.9365	-3.89521	0.000141302	0.0136073
200844	C3orf67	chromosome 3 open reading frame 67	-0.776058	1.54287	-3.89501	0.000141408	0.0136073
85301	COL27A1	collagen type XXVII alpha 1 chain	-1.12178	2.28571	-3.89078	0.000143687	0.0136605
54492	NEURL1B	neuralized E3 ubiquitin protein ligase 1B	0.975913	1.87333	3.89075	0.000143703	0.0136605
2624	GATA2	GATA binding protein 2	1.52743	2.94176	3.88754	0.000145455	0.0137437
53938	PPIL3	peptidylprolyl isomerase like 3	-0.420236	5.07635	-3.88135	0.000148896	0.0139425
84915	FAM222A	family with sequence similarity 222 member A	0.816066	1.55275	3.88057	0.000149336	0.0139425
5239	PGM5	phosphoglucomutase 5	0.80045	0.616037	3.87589	0.000151991	0.0141024
3988	LIPA	lipase A, lysosomal acid type	-0.742431	5.01989	-3.8744	0.000152847	0.0141024
9066	SYT7	synaptotagmin 7	1.22186	1.81988	3.86949	0.0001557	0.0142007
60401	EDA2R	ectodysplasin A2 receptor	-1.02933	0.931922	-3.86868	0.000156179	0.0142007
9159	PCSK7	proprotein convertase subtilisin/kexin type 7	0.504011	4.69027	3.86791	0.000156628	0.0142007
6696	SPP1	secreted phosphoprotein 1	-2.24374	3.00278	-3.85616	0.000163702	0.0147027
4867	NPHP1	nephrocystin 1	-0.580215	2.1198	-3.85561	0.000164041	0.0147027
57799	RAB40C	RAB40C, member RAS oncogene family	0.508652	3.78089	3.85174	0.000166445	0.0147231
283987	HID1	HID1 domain containing	1.40772	2.24822	3.85144	0.000166627	0.0147231
116983	ACAP3	ArfGAP with coiled-coil, ankyrin repeat and PH domains 3	0.660899	4.55049	3.85071	0.000167084	0.0147231
4791	NFKB2	nuclear factor kappa B subunit 2	-0.696195	4.37174	-3.84108	0.000173229	0.0151793
10622	POLR3G	RNA polymerase III subunit G	-0.882439	3.59813	-3.83513	0.000177129	0.0153364
79892	MCMBP	minichromosome maintenance complex binding protein	-0.37735	5.49228	-3.8315	0.000179548	0.0153364
84456	L3MBTL3	L3MBTL histone methyl-lysine binding protein 3	-0.723726	2.19281	-3.83013	0.000180468	0.0153364
1730	DIAPH2	diaphanous related formin 2	-0.705546	2.15025	-3.82912	0.000181149	0.0153364
114793	FMNL2	formin like 2	-0.967071	3.51447	-3.8283	0.000181705	0.0153364
64689	GORASP1	golgi reassembly stacking protein 1	0.417457	4.86149	3.8283	0.000181707	0.0153364
441531	PGAM4	phosphoglycerate mutase family member 4	-0.267656	0.541286	-3.82806	0.000181866	0.0153364
79917	MAGIX	MAGI family member, X-linked	0.484649	1.25218	3.82594	0.000183315	0.0153759
26145	IRF2BP1	interferon regulatory factor 2 binding protein 1	0.475261	3.59184	3.82396	0.000184675	0.0154076
80772	CPTP	ceramide-1-phosphate transfer protein	0.507168	3.96117	3.82173	0.000186214	0.015427
10308	ZNF267	zinc finger protein 267	-0.467632	2.9635	-3.81982	0.000187546	0.015427
3773	KCNJ16	potassium voltage-gated channel subfamily J member 16	-0.80356	0.332233	-3.81938	0.000187858	0.015427
118430	MUCL1	mucin like 1	1.09428	0.510507	3.81053	0.000194153	0.0157839
6046	BRD2	bromodomain containing 2	0.410773	7.32211	3.81026	0.000194351	0.0157839
11164	NUDT5	nudix hydrolase 5	-0.405736	6.27225	-3.80905	0.000195223	0.0157839
79570	NKAIN1	sodium/potassium transporting ATPase interacting 1	0.708425	0.593282	3.807	0.000196722	0.0158235
9446	GSTO1	glutathione S-transferase omega 1	-0.770921	6.87882	-3.80213	0.000200311	0.0159334
84002	B3GNT5	UDP-GlcNAc:betaGal beta-1,3-N-acetylglucosaminyltransferase 5	-1.0989	2.81036	-3.80093	0.000201212	0.0159334
54974	THG1L	tRNA-histidine guanylyltransferase 1 like	-0.466548	3.94062	-3.80028	0.000201696	0.0159334
10333	TLR6	toll like receptor 6	-0.678885	1.2481	-3.79946	0.000202309	0.0159334
10935	PRDX3	peroxiredoxin 3	-0.437858	7.44901	-3.79832	0.000203167	0.0159334
400713	ZNF880	zinc finger protein 880	1.24919	2.0301	3.79605	0.000204886	0.0159883
27092	CACNG4	calcium voltage-gated channel auxiliary subunit gamma 4	1.24878	1.37147	3.79447	0.000206096	0.016003
148418	SAMD13	sterile alpha motif domain containing 13	-0.545609	1.17075	-3.7928	0.000207377	0.0160114
79269	DCAF10	DDB1 and CUL4 associated factor 10	0.373466	3.40895	3.79123	0.000208583	0.0160114
85378	TUBGCP6	tubulin gamma complex associated protein 6	0.449045	4.11947	3.78908	0.000210254	0.0160114
80303	EFHD1	EF-hand domain family member D1	1.47624	1.5923	3.78671	0.000212112	0.0160114
54014	BRWD1	bromodomain and WD repeat domain containing 1	0.464031	3.80143	3.78666	0.000212147	0.0160114
389114	ZNF662	zinc finger protein 662	0.63603	0.527389	3.78446	0.000213887	0.0160114
11284	PNKP	polynucleotide kinase 3'-phosphatase	0.428784	5.39464	3.78338	0.000214741	0.0160114
7922	SLC39A7	solute carrier family 39 member 7	0.477266	6.88306	3.78259	0.000215374	0.0160114
201973	PRIMPOL	primase and DNA directed polymerase	-0.440373	3.50406	-3.78191	0.000215913	0.0160114
3776	KCNK2	potassium two pore domain channel subfamily K member 2	0.904703	0.713905	3.78129	0.000216411	0.0160114
55762	ZNF701	zinc finger protein 701	0.627971	2.28018	3.77843	0.000218708	0.0160312
8733	GPAA1	glycosylphosphatidylinositol anchor attachment 1	0.444707	6.34248	3.77842	0.000218724	0.0160312
284352	PPP1R37	protein phosphatase 1 regulatory subunit 37	0.416887	3.91122	3.77553	0.00022107	0.0160947
2746	GLUD1	glutamate dehydrogenase 1	-0.442058	6.25784	-3.77483	0.000221641	0.0160947
25961	NUDT13	nudix hydrolase 13	-0.538055	1.6478	-3.77197	0.000223998	0.016173
115703	ARHGAP33	Rho GTPase activating protein 33	0.756012	3.21137	3.77102	0.000224783	0.016173
26010	SPATS2L	spermatogenesis associated serine rich 2 like	-1.092	5.3994	-3.76915	0.000226345	0.016211
390927	ZNF793	zinc finger protein 793	0.74202	1.05056	3.76727	0.000227922	0.0162498
137994	LETM2	leucine zipper and EF-hand containing transmembrane protein 2	-0.974195	2.7499	-3.76389	0.000230776	0.0162786
1374	CPT1A	carnitine palmitoyltransferase 1A	1.02507	4.25179	3.76369	0.000230949	0.0162786
1773	DNASE1	deoxyribonuclease 1	0.626889	3.40933	3.76312	0.000231439	0.0162786
3985	LIMK2	LIM domain kinase 2	0.812292	4.51032	3.76156	0.000232767	0.0162824
55588	MED29	mediator complex subunit 29	0.373939	4.43078	3.76063	0.000233569	0.0162824
415	ARSE	arylsulfatase E	-1.1207	1.09847	-3.7593	0.000234715	0.0162899
55195	CCDC198	coiled-coil domain containing 198	-0.87542	0.576012	-3.75553	0.000237996	0.0164448
55665	URGCP	upregulator of cell proliferation	0.405543	4.27643	3.75342	0.000239859	0.0164887
342538	NACA2	nascent polypeptide associated complex subunit alpha 2	-0.373782	1.08851	-3.75177	0.000241314	0.0164887
92482	BBIP1	BBSome interacting protein 1	-0.531738	4.42734	-3.74996	0.000242931	0.0164887
388558	ZNF808	zinc finger protein 808	0.577229	2.09216	3.74945	0.000243386	0.0164887
9498	SLC4A8	solute carrier family 4 member 8	0.733866	1.35799	3.74889	0.000243888	0.0164887
22880	MORC2	MORC family CW-type zinc finger 2	0.371224	4.27703	3.74555	0.000246898	0.0165339
6916	TBXAS1	thromboxane A synthase 1	-1.07835	1.8369	-3.74484	0.000247545	0.0165339
27291	R3HCC1L	R3H domain and coiled-coil containing 1 like	-0.368786	3.4072	-3.74465	0.000247718	0.0165339
8601	RGS20	regulator of G protein signaling 20	-1.20981	2.18466	-3.74166	0.000250459	0.016646
80008	TMEM156	transmembrane protein 156	-1.33247	1.86461	-3.73794	0.000253895	0.0168032
11019	LIAS	lipoic acid synthetase	-0.457026	3.75476	-3.73545	0.000256226	0.0168144
55325	UFSP2	UFM1 specific peptidase 2	-0.401889	3.95326	-3.73472	0.000256911	0.0168144
84343	HPS3	HPS3 biogenesis of lysosomal organelles complex 2 subunit 1	-0.506804	4.12164	-3.73433	0.00025728	0.0168144
64377	CHST8	carbohydrate sulfotransferase 8	0.611137	0.326615	3.72987	0.000261522	0.0169124
11283	CYP4F8	cytochrome P450 family 4 subfamily F member 8	0.538635	0.224282	3.72936	0.000262012	0.0169124
9580	SOX13	SRY-box 13	1.03377	3.18914	3.72936	0.000262015	0.0169124
533	ATP6V0B	ATPase H+ transporting V0 subunit b	0.434945	6.94192	3.72152	0.000269645	0.0173336
53840	TRIM34	tripartite motif containing 34	-0.783515	2.27922	-3.71883	0.000272308	0.0174333
79850	FAM57A	family with sequence similarity 57 member A	-0.641644	4.0347	-3.71214	0.000279041	0.017728
9369	NRXN3	neurexin 3	0.825968	0.812576	3.71201	0.000279173	0.017728
841	CASP8	caspase 8	-0.718152	4.4561	-3.70796	0.000283338	0.017849
25807	RHBDD3	rhomboid domain containing 3	0.453731	4.80012	3.70794	0.000283353	0.017849
162	AP1B1	adaptor related protein complex 1 subunit beta 1	0.386747	5.23151	3.69665	0.000295253	0.018469
197342	EME2	essential meiotic structure-specific endonuclease subunit 2	0.598778	3.12807	3.69637	0.000295552	0.018469
8775	NAPA	NSF attachment protein alpha	0.4108	5.95797	3.6942	0.000297893	0.0185415
23682	RAB38	RAB38, member RAS oncogene family	-1.32196	2.15343	-3.68642	0.000306444	0.0189823
64167	ERAP2	endoplasmic reticulum aminopeptidase 2	-1.24552	3.04001	-3.68557	0.000307395	0.0189823
7043	TGFB3	transforming growth factor beta 3	0.958551	1.93581	3.68179	0.000311633	0.0191611
51106	TFB1M	transcription factor B1, mitochondrial	-0.49475	4.10025	-3.68082	0.000312735	0.0191611
202333	CMYA5	cardiomyopathy associated 5	0.387047	0.463558	3.67808	0.000315857	0.0192771
51660	MPC1	mitochondrial pyruvate carrier 1	0.609307	4.79984	3.67405	0.00032051	0.0194853
90990	KIFC2	kinesin family member C2	0.739869	4.24958	3.67294	0.000321803	0.0194883
220441	RNF152	ring finger protein 152	0.681349	0.800948	3.66771	0.000327945	0.0197295
581	BAX	BCL2 associated X, apoptosis regulator	-0.526471	7.33132	-3.66622	0.000329728	0.0197295
112936	VPS26B	VPS26, retromer complex component B	0.544167	4.42514	3.66568	0.000330374	0.0197295
8727	CTNNAL1	catenin alpha like 1	-0.849622	5.35359	-3.6653	0.000330817	0.0197295
25803	SPDEF	SAM pointed domain containing ETS transcription factor	1.46766	1.21231	3.66242	0.000334289	0.0197402
2801	GOLGA2	golgin A2	0.415547	5.74759	3.66121	0.000335746	0.0197402
6293	VPS52	VPS52 subunit of GARP complex	0.387853	5.31455	3.66066	0.000336414	0.0197402
51043	ZBTB7B	zinc finger and BTB domain containing 7B	0.642822	4.09328	3.66021	0.000336962	0.0197402
84865	CCDC142	coiled-coil domain containing 142	0.429401	3.13008	3.65994	0.000337289	0.0197402
776	CACNA1D	calcium voltage-gated channel subunit alpha1 D	0.838981	0.905681	3.65489	0.0003435	0.020029
169981	SPIN3	spindlin family member 3	0.693255	2.58326	3.65092	0.000348452	0.0202425
563	AZGP1	alpha-2-glycoprotein 1, zinc-binding	1.66809	1.81113	3.64732	0.000353012	0.0202822
10048	RANBP9	RAN binding protein 9	0.385729	4.79997	3.64688	0.00035357	0.0202822
7249	TSC2	TSC complex subunit 2	0.427754	5.36761	3.64625	0.000354374	0.0202822
143	PARP4	poly(ADP-ribose) polymerase family member 4	-0.657867	4.59561	-3.64546	0.000355381	0.0202822
7321	UBE2D1	ubiquitin conjugating enzyme E2 D1	-0.440379	3.50797	-3.64529	0.000355601	0.0202822
51202	DDX47	DEAD-box helicase 47	-0.433714	5.99869	-3.64339	0.000358041	0.0203474
254263	CNIH2	cornichon family AMPA receptor auxiliary protein 2	0.783807	1.5396	3.64067	0.000361559	0.0204731
3428	IFI16	interferon gamma inducible protein 16	-1.72367	4.74543	-3.63673	0.000366733	0.0206914
55048	VPS37C	VPS37C subunit of ESCRT-I	0.417848	3.7009	3.63156	0.0003736	0.0210033
84959	UBASH3B	ubiquitin associated and SH3 domain containing B	-1.10501	2.94515	-3.62703	0.000379732	0.0211764
29081	METTL5	methyltransferase like 5	-0.331319	6.26911	-3.62597	0.000381174	0.0211764
6236	RRAD	RRAD, Ras related glycolysis inhibitor and calcium channel regulator	-1.16498	1.27258	-3.62535	0.000382021	0.0211764
5281	PIGF	phosphatidylinositol glycan anchor biosynthesis class F	-0.405156	4.28365	-3.62531	0.000382079	0.0211764
84436	ZNF528	zinc finger protein 528	1.19565	2.4187	3.62277	0.000385571	0.0212947
3660	IRF2	interferon regulatory factor 2	-0.550648	3.78437	-3.62145	0.000387412	0.0213212
25937	WWTR1	WW domain containing transcription regulator 1	-1.15995	4.18606	-3.62005	0.000389352	0.0213531
486	FXYD2	FXYD domain containing ion transport regulator 2	-1.21625	0.858842	-3.61607	0.000394952	0.0215306
2049	EPHB3	EPH receptor B3	1.07857	1.99658	3.6158	0.000395335	0.0215306
10005	ACOT8	acyl-CoA thioesterase 8	0.385378	4.70048	3.61348	0.000398628	0.0216349
2029	ENSA	endosulfine alpha	0.441486	7.55681	3.61031	0.000403169	0.0218059
162963	ZNF610	zinc finger protein 610	0.575894	0.866593	3.60661	0.00040854	0.0220204
6097	RORC	RAR related orphan receptor C	0.623868	0.509344	3.60496	0.000410952	0.0220746
54882	ANKHD1	ankyrin repeat and KH domain containing 1	0.347439	5.85413	3.60187	0.000415518	0.0221782
148198	ZNF98	zinc finger protein 98	0.535629	0.306214	3.60137	0.000416254	0.0221782
6387	CXCL12	C-X-C motif chemokine ligand 12	1.31087	0.910374	3.60079	0.000417122	0.0221782
84787	KMT5C	lysine methyltransferase 5C	0.562331	3.5285	3.59907	0.000419697	0.0221984
79828	METTL8	methyltransferase like 8	-0.469616	3.66458	-3.59864	0.000420333	0.0221984
3418	IDH2	isocitrate dehydrogenase (NADP(+)) 2, mitochondrial	0.800103	5.85986	3.59725	0.000422418	0.0222337
23637	RABGAP1	RAB GTPase activating protein 1	0.355533	4.33315	3.59486	0.000426047	0.022327
23038	WDTC1	WD and tetratricopeptide repeats 1	0.449258	3.69432	3.59367	0.000427853	0.022327
2595	GANC	glucosidase alpha, neutral C	-0.455295	3.49333	-3.59327	0.000428461	0.022327
200539	ANKRD23	ankyrin repeat domain 23	0.423528	1.64514	3.59042	0.00043283	0.0223908
1355	COX15	cytochrome c oxidase assembly homolog COX15	-0.359897	4.74746	-3.59011	0.000433311	0.0223908
2166	FAAH	fatty acid amide hydrolase	1.08232	2.32372	3.58968	0.000433969	0.0223908
58499	ZNF462	zinc finger protein 462	-0.619445	1.91884	-3.58768	0.000437073	0.0224351
151194	METTL21A	methyltransferase like 21A	-0.496315	4.44238	-3.58641	0.00043905	0.0224351
144608	C12orf60	chromosome 12 open reading frame 60	-0.449721	1.49554	-3.58465	0.000441809	0.0224351
80201	HKDC1	hexokinase domain containing 1	-1.42096	1.76201	-3.58444	0.000442142	0.0224351
5733	PTGER3	prostaglandin E receptor 3	0.86927	0.455872	3.58367	0.000443354	0.0224351
10585	POMT1	protein O-mannosyltransferase 1	0.47495	4.24718	3.58281	0.000444722	0.0224351
1850	DUSP8	dual specificity phosphatase 8	0.673911	1.46242	3.58163	0.000446579	0.0224351
5209	PFKFB3	6-phosphofructo-2-kinase/fructose-2,6-biphosphatase 3	-0.763289	4.49897	-3.58138	0.000446981	0.0224351
121457	IKBIP	IKBKB interacting protein	-0.852504	4.21645	-3.58082	0.000447867	0.0224351
3945	LDHB	lactate dehydrogenase B	-1.65247	9.00477	-3.58003	0.000449131	0.0224351
3815	KIT	KIT proto-oncogene, receptor tyrosine kinase	0.897293	0.770461	3.57784	0.000452643	0.0224775
90423	ATP6V1E2	ATPase H+ transporting V1 subunit E2	-0.54263	2.67275	-3.57663	0.000454595	0.0224775
3437	IFIT3	interferon induced protein with tetratricopeptide repeats 3	-1.29387	2.97692	-3.57649	0.000454821	0.0224775
7062	TCHH	trichohyalin	0.559554	0.520483	3.57594	0.000455712	0.0224775
3646	EIF3E	eukaryotic translation initiation factor 3 subunit E	-0.481993	8.29552	-3.5735	0.000459672	0.0226017
3489	IGFBP6	insulin like growth factor binding protein 6	-1.7488	4.11474	-3.57148	0.000462986	0.0226254
22999	RIMS1	regulating synaptic membrane exocytosis 1	0.479747	0.293482	3.57144	0.000463038	0.0226254
163	AP2B1	adaptor related protein complex 2 subunit beta 1	-0.450581	6.24033	-3.56811	0.000468544	0.0227657
27247	NFU1	NFU1 iron-sulfur cluster scaffold	-0.410465	5.02521	-3.56795	0.000468812	0.0227657
3655	ITGA6	integrin subunit alpha 6	-1.36991	4.73405	-3.566	0.000472059	0.0228526
642515	PRRT1B	proline rich transmembrane protein 1B	0.408342	0.205132	3.55806	0.000485531	0.0234325
91156	IGFN1	immunoglobulin like and fibronectin type III domain containing 1	-1.28149	0.922076	-3.55334	0.000493703	0.023727
55901	THSD1	thrombospondin type 1 domain containing 1	-0.74918	1.27753	-3.55205	0.000495957	0.023727
283848	CES4A	carboxylesterase 4A	0.805285	1.03898	3.55192	0.000496171	0.023727
51082	POLR1D	RNA polymerase I and III subunit D	-0.444995	6.96455	-3.54892	0.000501461	0.0238775
81931	ZNF93	zinc finger protein 93	0.888627	2.08631	3.54841	0.000502365	0.0238775
1388	ATF6B	activating transcription factor 6 beta	0.410124	5.83233	3.5464	0.000505945	0.0239247
6272	SORT1	sortilin 1	0.918182	3.69937	3.54614	0.000506408	0.0239247
4067	LYN	LYN proto-oncogene, Src family tyrosine kinase	-1.01865	3.53776	-3.54287	0.000512288	0.0241298
55609	ZNF280C	zinc finger protein 280C	-0.417564	1.94435	-3.54201	0.000513836	0.0241303
6499	SKIV2L	Ski2 like RNA helicase	0.337481	5.21451	3.53976	0.000517929	0.0242499
142891	SAMD8	sterile alpha motif domain containing 8	-0.362589	2.9807	-3.53715	0.000522727	0.0244017
5236	PGM1	phosphoglucomutase 1	-0.783185	5.00099	-3.53468	0.000527282	0.0245413
162967	ZNF320	zinc finger protein 320	0.80272	2.3763	3.533	0.000530403	0.0246135
53	ACP2	acid phosphatase 2, lysosomal	0.46545	4.25043	3.53125	0.000533695	0.0246692
55177	RMDN3	regulator of microtubule dynamics 3	0.324364	4.89501	3.53069	0.000534748	0.0246692
79180	EFHD2	EF-hand domain family member D2	-0.679133	5.48165	-3.52857	0.000538738	0.0247804
23057	NMNAT2	nicotinamide nucleotide adenylyltransferase 2	1.04718	1.57014	3.527	0.000541731	0.0248452
27154	BRPF3	bromodomain and PHD finger containing 3	0.408381	3.83939	3.52606	0.000543509	0.0248541
56904	SH3GLB2	SH3 domain containing GRB2 like, endophilin B2	0.560246	5.67693	3.5221	0.000551128	0.0250708
10438	C1D	C1D nuclear receptor corepressor	-0.28924	5.24531	-3.52121	0.000552863	0.0250708
10482	NXF1	nuclear RNA export factor 1	0.263549	5.37637	3.52111	0.000553043	0.0250708
7766	ZNF223	zinc finger protein 223	0.550367	1.64061	3.51737	0.000560363	0.0253246
57545	CC2D2A	coiled-coil and C2 domain containing 2A	-0.637851	2.45553	-3.51616	0.00056274	0.0253246
3625	INHBB	inhibin subunit beta B	1.34996	1.57885	3.51512	0.000564792	0.0253246
65992	DDRGK1	DDRGK domain containing 1	0.474947	5.80643	3.51497	0.000565101	0.0253246
2963	GTF2F2	general transcription factor IIF subunit 2	-0.404528	4.5336	-3.51357	0.00056787	0.0253311
55034	MOCOS	molybdenum cofactor sulfurase	-0.817142	1.90444	-3.51317	0.000568661	0.0253311
8997	KALRN	kalirin RhoGEF kinase	0.854793	1.68332	3.51246	0.000570092	0.0253311
54518	APBB1IP	amyloid beta precursor protein binding family B member 1 interacting protein	-1.03401	1.58087	-3.50937	0.000576284	0.0255339
65055	REEP1	receptor accessory protein 1	0.73215	0.87449	3.50829	0.000578481	0.0255591
4673	NAP1L1	nucleosome assembly protein 1 like 1	-0.588325	8.75217	-3.50381	0.000587606	0.0258893
57559	STAMBPL1	STAM binding protein like 1	-0.860623	2.96739	-3.50152	0.000592346	0.0260212
3263	HPX	hemopexin	0.649533	0.700728	3.50076	0.000593918	0.0260212
389816	LRRC26	leucine rich repeat containing 26	0.726447	0.661121	3.49851	0.000598597	0.0261532
9659	PDE4DIP	phosphodiesterase 4D interacting protein	0.773007	4.16341	3.49637	0.000603085	0.0262065
388135	INSYN1	inhibitory synaptic factor 1	0.669781	0.619086	3.49634	0.000603158	0.0262065
8216	LZTR1	leucine zipper like transcription regulator 1	0.474425	4.35851	3.49481	0.000606384	0.0262738
8404	SPARCL1	SPARC like 1	-0.509476	0.387847	-3.49356	0.000609029	0.0262991
196074	METTL15	methyltransferase like 15	-0.310852	3.04106	-3.4905	0.000615572	0.0262991
79651	RHBDF2	rhomboid 5 homolog 2	-0.71884	4.3714	-3.49039	0.000615813	0.0262991
5699	PSMB10	proteasome subunit beta 10	-0.599788	5.56254	-3.48968	0.000617348	0.0262991
11137	PWP1	PWP1 homolog, endonuclein	-0.285818	5.57071	-3.48961	0.000617484	0.0262991
222	ALDH3B2	aldehyde dehydrogenase 3 family member B2	1.12549	1.01536	3.48912	0.000618534	0.0262991
149986	LSM14B	LSM family member 14B	0.347142	5.30482	3.48846	0.000619978	0.0262991
6617	SNAPC1	small nuclear RNA activating complex polypeptide 1	-0.67736	3.57071	-3.48825	0.000620434	0.0262991
57156	TMEM63C	transmembrane protein 63C	0.87311	1.32825	3.4875	0.000622058	0.0262991
29993	PACSIN1	protein kinase C and casein kinase substrate in neurons 1	0.792477	0.924645	3.47471	0.000650364	0.0274219
6672	SP100	SP100 nuclear antigen	-0.958074	4.80971	-3.47211	0.000656277	0.0275718
10393	ANAPC10	anaphase promoting complex subunit 10	-0.329611	4.34084	-3.4716	0.000657435	0.0275718
4795	NFKBIL1	NFKB inhibitor like 1	0.357682	3.95084	3.46897	0.000663474	0.027628
133396	IL31RA	interleukin 31 receptor A	-0.689369	0.689452	-3.46782	0.000666113	0.027628
8408	ULK1	unc-51 like autophagy activating kinase 1	0.516606	3.91678	3.46686	0.000668352	0.027628
83857	TMTC1	transmembrane and tetratricopeptide repeat containing 1	1.01449	1.23703	3.46685	0.00066837	0.027628
8567	MADD	MAP kinase activating death domain	0.4693	4.6463	3.46599	0.000670372	0.027628
57001	SDHAF3	succinate dehydrogenase complex assembly factor 3	-0.860018	4.72009	-3.46586	0.000670655	0.027628
7039	TGFA	transforming growth factor alpha	-1.34512	2.87435	-3.46546	0.000671593	0.027628
151651	EFHB	EF-hand domain family member B	-0.524912	0.634347	-3.46492	0.000672867	0.027628
7016	TESK1	testis associated actin remodelling kinase 1	0.562397	4.16983	3.45986	0.000684756	0.0280089
64084	CLSTN2	calsyntenin 2	0.863853	0.658656	3.45946	0.000685721	0.0280089
2182	ACSL4	acyl-CoA synthetase long chain family member 4	-0.835603	4.31022	-3.45871	0.0006875	0.0280089
65251	ZNF649	zinc finger protein 649	0.75207	1.99105	3.45746	0.000690475	0.0280572
56241	SUSD2	sushi domain containing 2	1.07574	1.20677	3.45607	0.000693805	0.0281197
29922	NME7	NME/NM23 family member 7	-0.505253	4.57358	-3.45464	0.000697253	0.0281619
4088	SMAD3	SMAD family member 3	-0.905445	4.44153	-3.45415	0.000698436	0.0281619
63941	NECAB3	N-terminal EF-hand calcium binding protein 3	0.522565	4.31759	3.45154	0.000704767	0.0282044
29105	CFAP20	cilia and flagella associated protein 20	-0.335327	5.4978	-3.45126	0.000705457	0.0282044
64061	TSPYL2	TSPY like 2	0.692946	3.95876	3.45085	0.000706453	0.0282044
1371	CPOX	coproporphyrinogen oxidase	-0.588379	4.34984	-3.45076	0.000706684	0.0282044
23213	SULF1	sulfatase 1	1.24362	1.06957	3.44983	0.000708943	0.0282228
55862	ECHDC1	ethylmalonyl-CoA decarboxylase 1	-0.802979	5.2004	-3.4491	0.000710753	0.0282232
79161	TMEM243	transmembrane protein 243	-0.647472	4.86752	-3.4461	0.000718159	0.0283172
597	BCL2A1	BCL2 related protein A1	-1.15694	1.20544	-3.44602	0.00071836	0.0283172
728229	TMEM191B	transmembrane protein 191B	0.628259	1.2626	3.44293	0.000726052	0.0283172
147923	ZNF420	zinc finger protein 420	0.550688	2.12017	3.44279	0.000726409	0.0283172
3433	IFIT2	interferon induced protein with tetratricopeptide repeats 2	-1.12668	2.19127	-3.44277	0.000726448	0.0283172
23042	PDXDC1	pyridoxal dependent decarboxylase domain containing 1	0.398456	5.67709	3.44276	0.000726473	0.0283172
1580	CYP4B1	cytochrome P450 family 4 subfamily B member 1	0.766411	0.521235	3.44207	0.000728217	0.0283172
124995	MRPL10	mitochondrial ribosomal protein L10	-0.340907	5.34948	-3.44199	0.000728423	0.0283172
100132074	FOXO6	forkhead box O6	0.73411	1.02028	3.44128	0.000730201	0.0283172
421	ARVCF	ARVCF delta catenin family member	0.717275	2.71806	3.44089	0.000731175	0.0283172
129049	SGSM1	small G protein signaling modulator 1	0.31714	0.302806	3.44	0.000733424	0.0283344
6637	SNRPG	small nuclear ribonucleoprotein polypeptide G	-0.327685	8.00875	-3.43771	0.000739243	0.028489
56987	BBX	BBX high mobility group box domain containing	-0.558983	4.05763	-3.43359	0.000749816	0.0288256
858	CAV2	caveolin 2	-1.69359	4.4607	-3.43239	0.000752936	0.0288748
6257	RXRB	retinoid X receptor beta	0.374042	4.70738	3.4299	0.000759406	0.0290088
10233	LRRC23	leucine rich repeat containing 23	-0.537459	2.95919	-3.42956	0.000760313	0.0290088
146712	B3GNTL1	UDP-GlcNAc:betaGal beta-1,3-N-acetylglucosaminyltransferase like 1	-0.634572	3.02495	-3.42892	0.000761979	0.0290088
23646	PLD3	phospholipase D family member 3	0.638405	6.72082	3.42571	0.000770456	0.0292605
285368	PRRT3	proline rich transmembrane protein 3	0.527213	1.31089	3.4222	0.000779787	0.0294554
8872	CDC123	cell division cycle 123	-0.351702	6.8627	-3.42181	0.00078083	0.0294554
6646	SOAT1	sterol O-acyltransferase 1	-0.666298	3.86045	-3.4211	0.000782752	0.0294554
6506	SLC1A2	solute carrier family 1 member 2	0.437864	0.313184	3.42074	0.000783726	0.0294554
56650	CLDND1	claudin domain containing 1	-0.50347	6.08384	-3.41992	0.000785932	0.0294554
1365	CLDN3	claudin 3	1.59653	2.24473	3.41958	0.000786853	0.0294554
9688	NUP93	nucleoporin 93	-0.367297	5.8693	-3.41788	0.000791456	0.0295571
134111	UBE2QL1	ubiquitin conjugating enzyme E2 Q family like 1	0.388473	0.220882	3.4132	0.000804274	0.0298581
9766	SUSD6	sushi domain containing 6	0.569882	3.18469	3.41319	0.000804303	0.0298581
1209	CLPTM1	CLPTM1 regulator of GABA type A receptor forward trafficking	0.30976	5.90367	3.41285	0.000805227	0.0298581
165679	SPTSSB	serine palmitoyltransferase small subunit B	1.36138	1.23843	3.41201	0.000807556	0.0298739
9744	ACAP1	ArfGAP with coiled-coil, ankyrin repeat and PH domains 1	-0.701451	2.28303	-3.41119	0.000809825	0.0298873
9585	KIF20B	kinesin family member 20B	-0.446423	3.72427	-3.4084	0.000817603	0.0301035
9980	DOP1B	DOP1 leucine zipper like protein B	0.61068	2.75886	3.40445	0.000828742	0.0304063
2011	MARK2	microtubule affinity regulating kinase 2	0.404696	4.32293	3.40411	0.000829705	0.0304063
10307	APBB3	amyloid beta precursor protein binding family B member 3	0.569109	3.69459	3.39875	0.000845065	0.0308336
51013	EXOSC1	exosome component 1	-0.354313	5.60761	-3.39867	0.000845295	0.0308336
6778	STAT6	signal transducer and activator of transcription 6	-0.915656	5.74901	-3.39684	0.000850606	0.0309553
4582	MUC1	mucin 1, cell surface associated	1.5265	3.45243	3.39554	0.000854386	0.031021
29882	ANAPC2	anaphase promoting complex subunit 2	0.380921	5.00042	3.39394	0.000859067	0.0311189
125113	KRT222	keratin 222	-0.449262	0.219738	-3.39274	0.00086259	0.0311745
7351	UCP2	uncoupling protein 2	1.33842	5.10447	3.38735	0.000878607	0.0316804
112724	RDH13	retinol dehydrogenase 13	0.63713	4.06511	3.38483	0.000886213	0.0318813
9590	AKAP12	A-kinase anchoring protein 12	-1.43196	3.23855	-3.38402	0.000888647	0.0318957
2867	FFAR2	free fatty acid receptor 2	0.374433	0.240557	3.38272	0.0008926	0.0319645
55870	ASH1L	ASH1 like histone lysine methyltransferase	0.353037	3.61834	3.38138	0.000896671	0.0320371
342908	ZNF404	zinc finger protein 404	0.538614	1.12268	3.38001	0.000900865	0.0321138
55672	NBPF1	NBPF member 1	0.548158	4.22026	3.37826	0.000906241	0.0322322
728642	CDK11A	cyclin dependent kinase 11A	0.419838	5.0516	3.37713	0.000909755	0.0322632
7694	ZNF135	zinc finger protein 135	0.535901	0.391081	3.37665	0.000911228	0.0322632
6414	SELENOP	selenoprotein P	1.28139	1.88275	3.37592	0.000913511	0.0322712
4152	MBD1	methyl-CpG binding domain protein 1	0.429946	5.06695	3.37314	0.000922183	0.0325044
388	RHOB	ras homolog family member B	0.87772	4.60591	3.37242	0.000924452	0.0325113
5116	PCNT	pericentrin	0.38476	4.31967	3.36945	0.000933798	0.0327615
64895	PAPOLG	poly(A) polymerase gamma	-0.253785	2.6508	-3.36884	0.000935746	0.0327615
58476	TP53INP2	tumor protein p53 inducible nuclear protein 2	0.726408	2.92507	3.36355	0.000952696	0.0332807
6045	RNF2	ring finger protein 2	-0.443164	3.71542	-3.36264	0.000955667	0.0333103
4038	LRP4	LDL receptor related protein 4	-0.971898	1.91818	-3.36134	0.000959872	0.0333827
3751	KCND2	potassium voltage-gated channel subfamily D member 2	0.399819	0.208833	3.35942	0.000966154	0.0333847
400793	C1orf226	chromosome 1 open reading frame 226	0.733888	1.75147	3.35924	0.000966746	0.0333847
54726	OTUD4	OTU deubiquitinase 4	-0.295564	3.904	-3.35876	0.000968295	0.0333847
286262	TPRN	taperin	0.615905	3.63176	3.35872	0.000968445	0.0333847
26762	HAVCR1	hepatitis A virus cellular receptor 1	-1.01218	0.65085	-3.35659	0.000975441	0.0335011
83549	UCK1	uridine-cytidine kinase 1	0.39477	4.53295	3.35607	0.000977169	0.0335011
122970	ACOT4	acyl-CoA thioesterase 4	0.723994	1.01149	3.35575	0.000978229	0.0335011
112817	HOGA1	4-hydroxy-2-oxoglutarate aldolase 1	-0.730103	0.837619	-3.35413	0.000983602	0.0336118
6364	CCL20	C-C motif chemokine ligand 20	-1.07438	1.31307	-3.3524	0.000989387	0.033736
2241	FER	FER tyrosine kinase	-0.477799	2.33654	-3.35028	0.000996514	0.0338968
3601	IL15RA	interleukin 15 receptor subunit alpha	-0.986572	2.62924	-3.34954	0.000999024	0.0338968
4528	MTIF2	mitochondrial translational initiation factor 2	-0.293867	5.0045	-3.34907	0.00100059	0.0338968
51170	HSD17B11	hydroxysteroid 17-beta dehydrogenase 11	-0.986306	4.40395	-3.34605	0.00101087	0.0341191
9684	LRRC14	leucine rich repeat containing 14	0.397089	4.47736	3.34538	0.00101314	0.0341191
57571	CARNS1	carnosine synthase 1	0.425951	0.53751	3.34523	0.00101367	0.0341191
10346	TRIM22	tripartite motif containing 22	-1.34912	2.83737	-3.33967	0.00103287	0.0346345
56928	SPPL2B	signal peptide peptidase like 2B	0.503424	5.0615	3.33952	0.0010334	0.0346345
10285	SMNDC1	survival motor neuron domain containing 1	-0.278861	4.68065	-3.33838	0.00103739	0.0346777
1797	DXO	decapping exoribonuclease	0.323113	4.15206	3.33697	0.00104234	0.0346777
23199	GSE1	Gse1 coiled-coil protein	0.663934	4.79834	3.33646	0.00104412	0.0346777
23647	ARFIP2	ADP ribosylation factor interacting protein 2	0.377349	5.52888	3.33586	0.00104624	0.0346777
54623	PAF1	PAF1 homolog, Paf1/RNA polymerase II complex component	0.34	5.72506	3.33543	0.00104775	0.0346777
54848	ARHGEF38	Rho guanine nucleotide exchange factor 38	0.579626	0.578193	3.33537	0.00104796	0.0346777
84916	UTP4	UTP4 small subunit processome component	-0.359949	5.83863	-3.33399	0.00105284	0.034766
3169	FOXA1	forkhead box A1	1.32321	2.24095	3.33303	0.00105627	0.0347869
367	AR	androgen receptor	0.776929	0.670547	3.33257	0.00105791	0.0347869
83871	RAB34	RAB34, member RAS oncogene family	-1.69731	4.52046	-3.33016	0.00106653	0.0349968
10647	SCGB1D2	secretoglobin family 1D member 2	0.856782	0.390787	3.32902	0.00107064	0.0350583
9603	NFE2L3	nuclear factor, erythroid 2 like 3	-0.946314	3.90011	-3.32822	0.00107352	0.0350794
333	APLP1	amyloid beta precursor like protein 1	1.18031	3.35242	3.32395	0.00108905	0.0355131
644890	MEIG1	meiosis/spermiogenesis associated 1	-0.311493	0.527193	-3.32292	0.00109282	0.035562
6199	RPS6KB2	ribosomal protein S6 kinase B2	0.379108	5.50236	3.32181	0.00109691	0.0356211
2804	GOLGB1	golgin B1	0.313524	4.29031	3.31986	0.00110415	0.0357821
210	ALAD	aminolevulinate dehydratase	0.37159	4.1534	3.31648	0.00111673	0.036044
5971	RELB	RELB proto-oncogene, NF-kB subunit	-0.757825	3.20115	-3.31646	0.00111682	0.036044
10606	PAICS	phosphoribosylaminoimidazole carboxylase and phosphoribosylaminoimidazolesuccinocarboxamide synthase	-0.389479	7.08843	-3.31505	0.00112212	0.0361404
343990	KIAA1211L	KIAA1211 like	0.915089	1.22764	3.31307	0.00112958	0.0363063
63916	ELMO2	engulfment and cell motility 2	0.327814	4.49574	3.3103	0.00114013	0.0365703
91120	ZNF682	zinc finger protein 682	0.802057	1.58254	3.30843	0.0011473	0.036616
10446	LRRN2	leucine rich repeat neuronal 2	0.68067	0.672837	3.30814	0.00114842	0.036616
23053	ZSWIM8	zinc finger SWIM-type containing 8	0.453987	5.33093	3.3081	0.00114855	0.036616
9906	SLC35E2A	solute carrier family 35 member E2A	0.503125	2.89779	3.30649	0.00115479	0.0367401
25816	TNFAIP8	TNF alpha induced protein 8	-0.748308	3.97612	-3.30573	0.00115771	0.0367583
10956	OS9	OS9 endoplasmic reticulum lectin	0.41217	7.0549	3.30367	0.00116572	0.0369381
51008	ASCC1	activating signal cointegrator 1 complex subunit 1	-0.452893	4.7407	-3.30207	0.00117199	0.0370154
51750	RTEL1	regulator of telomere elongation helicase 1	0.391907	3.60163	3.30184	0.00117288	0.0370154
26278	SACS	sacsin molecular chaperone	-0.734399	2.93796	-3.30023	0.00117922	0.0371408
57148	RALGAPB	Ral GTPase activating protein non-catalytic beta subunit	0.273567	4.12433	3.29944	0.00118234	0.0371644
85363	TRIM5	tripartite motif containing 5	-0.606427	3.71705	-3.29571	0.0011972	0.0373976
9722	NOS1AP	nitric oxide synthase 1 adaptor protein	0.501333	1.05125	3.2952	0.00119923	0.0373976
2653	GCSH	glycine cleavage system protein H	-0.539155	5.49044	-3.29519	0.00119926	0.0373976
286075	ZNF707	zinc finger protein 707	0.361512	3.68747	3.29396	0.00120422	0.0373976
7267	TTC3	tetratricopeptide repeat domain 3	0.468919	5.42469	3.29372	0.00120516	0.0373976
79803	HPS6	HPS6 biogenesis of lysosomal organelles complex 2 subunit 3	-0.322932	3.54616	-3.29352	0.00120597	0.0373976
22835	ZFP30	ZFP30 zinc finger protein	0.676917	2.07258	3.2934	0.00120645	0.0373976
23008	KLHDC10	kelch domain containing 10	0.327747	3.93675	3.29226	0.00121104	0.0374658
22996	TTC39A	tetratricopeptide repeat domain 39A	1.0992	1.85318	3.29147	0.00121425	0.0374913
8349	HIST2H2BE	histone cluster 2 H2B family member e	0.732916	2.60455	3.29013	0.00121969	0.0375676
1429	CRYZ	crystallin zeta	-0.684131	5.00902	-3.28968	0.00122152	0.0375676
6928	HNF1B	HNF1 homeobox B	-1.00142	0.81613	-3.28732	0.0012312	0.0377161
8786	RGS11	regulator of G protein signaling 11	0.539626	0.613278	3.28677	0.00123346	0.0377161
654254	ZNF732	zinc finger protein 732	0.306213	0.231437	3.28674	0.00123356	0.0377161
117854	TRIM6	tripartite motif containing 6	-0.942199	1.91062	-3.28363	0.00124641	0.0380349
6882	TAF11	TATA-box binding protein associated factor 11	0.338381	4.81936	3.28037	0.00126004	0.0383761
4927	NUP88	nucleoporin 88	-0.378044	5.98696	-3.27973	0.00126274	0.0383838
81669	CCNL2	cyclin L2	0.463952	6.61047	3.2787	0.00126706	0.0384407
83451	ABHD11	abhydrolase domain containing 11	0.627651	4.90566	3.27783	0.00127075	0.0384781
346689	KLRG2	killer cell lectin like receptor G2	0.698025	0.618855	3.27701	0.00127419	0.0385081
22800	RRAS2	RAS related 2	-0.906017	4.98438	-3.276	0.00127848	0.0385633
1787	TRDMT1	tRNA aspartic acid methyltransferase 1	-0.4343	1.96958	-3.27408	0.00128669	0.0386798
1381	CRABP1	cellular retinoic acid binding protein 1	1.26478	0.948936	3.27394	0.00128727	0.0386798
56938	ARNTL2	aryl hydrocarbon receptor nuclear translocator like 2	-0.981938	3.26266	-3.27232	0.00129422	0.0387423
2014	EMP3	epithelial membrane protein 3	-1.55577	5.44041	-3.27231	0.00129429	0.0387423
255189	PLA2G4F	phospholipase A2 group IVF	0.56133	0.521539	3.27015	0.00130362	0.0388075
900	CCNG1	cyclin G1	-0.536658	5.97104	-3.26996	0.00130444	0.0388075
9757	KMT2B	lysine methyltransferase 2B	0.343064	4.38003	3.26976	0.00130531	0.0388075
80728	ARHGAP39	Rho GTPase activating protein 39	0.519248	2.22418	3.26915	0.00130792	0.0388075
5621	PRNP	prion protein	-0.974884	6.14826	-3.26894	0.00130884	0.0388075
200894	ARL13B	ADP ribosylation factor like GTPase 13B	-0.440937	3.03861	-3.26629	0.00132041	0.0390768
400451	FAM174B	family with sequence similarity 174 member B	0.987146	2.48928	3.26512	0.00132556	0.039155
255919	CNEP1R1	CTD nuclear envelope phosphatase 1 regulatory subunit 1	-0.303594	3.59654	-3.26419	0.00132965	0.039155
7481	WNT11	Wnt family member 11	0.866818	0.892729	3.26379	0.0013314	0.039155
2972	BRF1	BRF1 RNA polymerase III transcription initiation factor subunit	0.381482	4.11074	3.26342	0.00133304	0.039155
26574	AATF	apoptosis antagonizing transcription factor	-0.344272	5.92905	-3.26262	0.00133661	0.0391692
4023	LPL	lipoprotein lipase	0.798805	0.634104	3.26219	0.00133852	0.0391692
342926	ZNF677	zinc finger protein 677	1.11224	1.23638	3.26125	0.00134268	0.0391964
6737	TRIM21	tripartite motif containing 21	-0.608739	3.64084	-3.26085	0.00134445	0.0391964
55243	KIRREL1	kirre like nephrin family adhesion molecule 1	-1.27211	3.61739	-3.26023	0.00134724	0.0392051
114781	BTBD9	BTB domain containing 9	0.331623	1.79187	3.25721	0.00136078	0.0395256
101059938	NPIPA7	nuclear pore complex interacting protein family member A7	0.497048	3.09899	3.255	0.00137079	0.0397427
144110	TMEM86A	transmembrane protein 86A	0.527652	0.995183	3.25374	0.0013765	0.0398346
2004	ELK3	ETS transcription factor ELK3	-0.803392	3.78032	-3.25294	0.00138016	0.039867
5588	PRKCQ	protein kinase C theta	-0.647451	0.854067	-3.25184	0.0013852	0.0399283
2113	ETS1	ETS proto-oncogene 1, transcription factor	-1.36695	4.44911	-3.25136	0.00138737	0.0399283
7392	USF2	upstream transcription factor 2, c-fos interacting	0.382016	6.39134	3.25067	0.00139053	0.039946
54973	INTS11	integrator complex subunit 11	0.31993	6.41354	3.24852	0.00140047	0.0401578
55247	NEIL3	nei like DNA glycosylase 3	-0.548513	3.27612	-3.2477	0.00140425	0.0401927
57718	PPP4R4	protein phosphatase 4 regulatory subunit 4	-0.601461	0.838758	-3.2452	0.0014159	0.0403541
6233	RPS27A	ribosomal protein S27a	-0.275692	10.6027	-3.24476	0.00141796	0.0403541
657	BMPR1A	bone morphogenetic protein receptor type 1A	-0.541023	3.58516	-3.24432	0.00142002	0.0403541
80345	ZSCAN16	zinc finger and SCAN domain containing 16	0.558525	2.48264	3.24423	0.00142047	0.0403541
4952	OCRL	OCRL inositol polyphosphate-5-phosphatase	0.425489	3.77829	3.24374	0.00142275	0.0403541
50485	SMARCAL1	SWI/SNF related, matrix associated, actin dependent regulator of chromatin, subfamily a like 1	-0.277267	3.67581	-3.24271	0.00142758	0.0404182
10608	MXD4	MAX dimerization protein 4	0.599459	3.80025	3.24035	0.00143878	0.0405905
2171	FABP5	fatty acid binding protein 5	-1.47776	6.43689	-3.23972	0.00144176	0.0405905
113	ADCY7	adenylate cyclase 7	-0.897441	3.45782	-3.23928	0.00144387	0.0405905
3198	HOXA1	homeobox A1	-0.674054	1.52069	-3.2391	0.00144472	0.0405905
79621	RNASEH2B	ribonuclease H2 subunit B	-0.550583	5.26014	-3.2382	0.00144901	0.0405905
26123	TCTN3	tectonic family member 3	-0.33271	4.59532	-3.23816	0.0014492	0.0405905
547	KIF1A	kinesin family member 1A	1.06607	0.987537	3.23536	0.00146265	0.0408943
89941	RHOT2	ras homolog family member T2	0.369421	6.33954	3.23455	0.00146656	0.0409307
140710	SOGA1	suppressor of glucose, autophagy associated 1	0.622443	3.11261	3.23224	0.00147774	0.0410973
3656	IRAK2	interleukin 1 receptor associated kinase 2	-0.85661	1.93665	-3.23223	0.00147777	0.0410973
375775	PNPLA7	patatin like phospholipase domain containing 7	0.485158	1.07007	3.23167	0.00148052	0.0411009
23464	GCAT	glycine C-acetyltransferase	0.583797	3.83123	3.23068	0.00148534	0.0411617
7700	ZNF141	zinc finger protein 141	0.720341	2.1341	3.2293	0.00149214	0.0412774
9015	TAF1A	TATA-box binding protein associated factor, RNA polymerase I subunit A	-0.365488	3.43446	-3.22757	0.00150062	0.0414388
29940	DSE	dermatan sulfate epimerase	-0.910889	2.90035	-3.22641	0.00150637	0.0415245
5087	PBX1	PBX homeobox 1	1.08771	2.54364	3.22516	0.00151259	0.0416228
330	BIRC3	baculoviral IAP repeat containing 3	-1.28785	2.78295	-3.22386	0.00151906	0.0417276
5730	PTGDS	prostaglandin D2 synthase	0.619929	0.605105	3.22225	0.00152709	0.0418327
80007	C10orf88	chromosome 10 open reading frame 88	-0.292538	2.90126	-3.22203	0.00152822	0.0418327
84164	ASCC2	activating signal cointegrator 1 complex subunit 2	0.299468	5.23067	3.22023	0.00153729	0.0420052
389203	SMIM20	small integral membrane protein 20	-0.518754	4.9267	-3.21972	0.00153988	0.0420052
267002	PGBD2	piggyBac transposable element derived 2	0.361702	2.45965	3.21712	0.00155304	0.0422908
135293	PM20D2	peptidase M20 domain containing 2	-0.853116	3.42587	-3.21562	0.00156074	0.0424266
51686	OAZ3	ornithine decarboxylase antizyme 3	0.417018	1.23602	3.2123	0.00157782	0.0428167
56242	ZNF253	zinc finger protein 253	0.580789	1.85402	3.20947	0.0015925	0.0431405
7576	ZNF28	zinc finger protein 28	0.642152	3.29515	3.20807	0.0015998	0.0432634
27352	SGSM3	small G protein signaling modulator 3	0.457345	5.27195	3.20409	0.0016208	0.043696
51704	GPRC5B	G protein-coupled receptor class C group 5 member B	-1.07948	2.22454	-3.20376	0.00162256	0.043696
1363	CPE	carboxypeptidase E	1.37375	2.77492	3.20266	0.00162838	0.043696
140564	APOBEC3D	apolipoprotein B mRNA editing enzyme catalytic subunit 3D	-0.575134	1.10477	-3.20261	0.00162866	0.043696
58508	KMT2C	lysine methyltransferase 2C	0.402922	3.62939	3.20241	0.00162972	0.043696
9134	CCNE2	cyclin E2	0.589279	3.52988	3.20175	0.00163324	0.0437156
10644	IGF2BP2	insulin like growth factor 2 mRNA binding protein 2	-1.06945	4.07831	-3.20109	0.00163677	0.0437354
56062	KLHL4	kelch like family member 4	-0.703908	0.687201	-3.19991	0.00164309	0.0438298
5514	PPP1R10	protein phosphatase 1 regulatory subunit 10	0.285937	4.66503	3.19772	0.0016549	0.0439768
79623	GALNT14	polypeptide N-acetylgalactosaminyltransferase 14	-1.35943	2.52622	-3.19711	0.00165821	0.0439768
4232	MEST	mesoderm specific transcript	1.3692	4.37487	3.19659	0.001661	0.0439768
85450	ITPRIP	inositol 1,4,5-trisphosphate receptor interacting protein	-0.678479	2.9951	-3.19641	0.001662	0.0439768
9148	NEURL1	neuralized E3 ubiquitin protein ligase 1	0.864951	0.895382	3.1963	0.00166262	0.0439768
115201	ATG4A	autophagy related 4A cysteine peptidase	0.369803	2.98543	3.19475	0.001671	0.0441241
9419	CRIPT	CXXC repeat containing interactor of PDZ3 domain	-0.326186	3.58948	-3.19334	0.00167871	0.0442531
92922	CCDC102A	coiled-coil domain containing 102A	-0.557972	2.33165	-3.19129	0.00168999	0.0444758
57722	IGDCC4	immunoglobulin superfamily DCC subclass member 4	-0.589994	0.782909	-3.1902	0.00169603	0.0445599
221477	C6orf89	chromosome 6 open reading frame 89	0.355449	4.52184	3.1896	0.00169934	0.044572
3430	IFI35	interferon induced protein 35	-0.767673	4.17677	-3.18897	0.00170284	0.0445894
11179	ZNF277	zinc finger protein 277	-0.4393	3.7914	-3.18746	0.00171123	0.0446892
10135	NAMPT	nicotinamide phosphoribosyltransferase	-0.666932	6.05263	-3.18657	0.00171622	0.0446892
10321	CRISP3	cysteine rich secretory protein 3	0.515296	0.275228	3.18634	0.00171749	0.0446892
124842	TMEM132E	transmembrane protein 132E	0.465227	0.193186	3.18624	0.00171805	0.0446892
51626	DYNC2LI1	dynein cytoplasmic 2 light intermediate chain 1	-0.414046	3.82104	-3.18454	0.0017276	0.0447792
79646	PANK3	pantothenate kinase 3	0.331735	4.12434	3.18444	0.00172817	0.0447792
60491	NIF3L1	NGG1 interacting factor 3 like 1	-0.259836	4.89942	-3.184	0.00173062	0.0447792
3159	HMGA1	high mobility group AT-hook 1	-0.756597	8.12391	-3.18338	0.00173415	0.0447792
57393	CLTRN	collectrin, amino acid transport regulator	-0.570719	0.7858	-3.18288	0.00173694	0.0447792
112849	L3HYPDH	trans-L-3-hydroxyproline dehydratase	-0.508244	4.35502	-3.18245	0.00173938	0.0447792
79991	STN1	STN1 subunit of CST complex	-0.481599	3.91782	-3.18208	0.00174149	0.0447792
79641	ROGDI	rogdi atypical leucine zipper	0.567843	4.21412	3.1801	0.00175276	0.0449951
6821	SUOX	sulfite oxidase	0.487486	3.55961	3.1784	0.00176246	0.0451703
2967	GTF2H3	general transcription factor IIH subunit 3	-0.355733	5.05074	-3.17351	0.00179072	0.0457924
51379	CRLF3	cytokine receptor like factor 3	-0.372618	3.57258	-3.17275	0.00179515	0.0457924
525	ATP6V1B1	ATPase H+ transporting V1 subunit B1	0.904504	1.19166	3.17225	0.00179805	0.0457924
9555	H2AFY	H2A histone family member Y	0.368868	7.72685	3.17183	0.0018005	0.0457924
25799	ZNF324	zinc finger protein 324	0.310563	2.63966	3.17169	0.00180133	0.0457924
3748	KCNC3	potassium voltage-gated channel subfamily C member 3	0.876129	1.43489	3.16993	0.00181164	0.0459609
729085	FAM198A	golgi associated kinase 1A	0.433156	0.409895	3.16934	0.0018151	0.0459609
65080	MRPL44	mitochondrial ribosomal protein L44	-0.318822	4.84616	-3.16901	0.00181708	0.0459609
400745	SH2D5	SH2 domain containing 5	-0.698085	1.50628	-3.16772	0.00182464	0.0459609
10329	RXYLT1	ribitol xylosyltransferase 1	-0.322963	4.06011	-3.16767	0.00182497	0.0459609
7040	TGFB1	transforming growth factor beta 1	-0.953275	4.45165	-3.16757	0.00182554	0.0459609
200316	APOBEC3F	apolipoprotein B mRNA editing enzyme catalytic subunit 3F	-0.596917	2.18714	-3.16621	0.00183363	0.0460165
9221	NOLC1	nucleolar and coiled-body phosphoprotein 1	-0.426011	6.67565	-3.16583	0.00183591	0.0460165
11279	KLF8	Kruppel like factor 8	0.74291	0.841486	3.16572	0.00183655	0.0460165
79939	SLC35E1	solute carrier family 35 member E1	0.270317	4.42866	3.16446	0.00184405	0.0460734
55758	RCOR3	REST corepressor 3	0.323009	4.56515	3.16409	0.00184629	0.0460734
6154	RPL26	ribosomal protein L26	-0.371869	11.2977	-3.16382	0.00184787	0.0460734
30061	SLC40A1	solute carrier family 40 member 1	1.1394	1.55808	3.16337	0.00185057	0.0460734
408	ARRB1	arrestin beta 1	0.951643	3.05093	3.16243	0.0018562	0.0461403
9677	PPIP5K1	diphosphoinositol pentakisphosphate kinase 1	0.42805	4.07196	3.16021	0.00186961	0.0463522
66035	SLC2A11	solute carrier family 2 member 11	0.592899	3.69104	3.16004	0.00187064	0.0463522
56895	AGPAT4	1-acylglycerol-3-phosphate O-acyltransferase 4	-0.697915	1.72231	-3.15848	0.00188012	0.0465137
5324	PLAG1	PLAG1 zinc finger	-0.56868	1.50449	-3.15567	0.0018973	0.0468649
64130	LIN7B	lin-7 homolog B, crumbs cell polarity complex component	0.46393	2.87764	3.15509	0.00190087	0.0468791
8859	STK19	serine/threonine kinase 19	0.375209	4.3264	3.15322	0.00191242	0.047037
57552	NCEH1	neutral cholesterol ester hydrolase 1	-0.808891	3.76475	-3.15269	0.00191567	0.047037
4967	OGDH	oxoglutarate dehydrogenase	0.400954	5.51842	3.15219	0.00191879	0.047037
55964	SEPT3	septin 3	0.768522	1.3093	3.15183	0.00192101	0.047037
140730	RIMS4	regulating synaptic membrane exocytosis 4	0.678768	0.55842	3.15132	0.00192415	0.047037
2899	GRIK3	glutamate ionotropic receptor kainate type subunit 3	0.616206	0.364395	3.15029	0.0019306	0.047037
127255	LRRIQ3	leucine rich repeats and IQ motif containing 3	-0.346437	0.814189	-3.15019	0.00193121	0.047037
374786	EFCAB5	EF-hand calcium binding domain 5	-0.264501	0.542845	-3.14983	0.00193347	0.047037
2961	GTF2E2	general transcription factor IIE subunit 2	-0.422767	4.68757	-3.1497	0.00193426	0.047037
1602	DACH1	dachshund family transcription factor 1	0.686033	0.570125	3.1481	0.0019443	0.0472079
10786	SLC17A3	solute carrier family 17 member 3	-0.741215	0.27563	-3.14724	0.00194968	0.0472153
4926	NUMA1	nuclear mitotic apparatus protein 1	0.432662	6.58978	3.14709	0.00195062	0.0472153
8555	CDC14B	cell division cycle 14B	-0.601845	2.70037	-3.14631	0.00195558	0.0472623
8365	HIST1H4H	histone cluster 1 H4 family member h	0.81071	2.8959	3.14517	0.00196278	0.0473097
58495	OVOL2	ovo like zinc finger 2	0.922801	1.42721	3.14504	0.00196357	0.0473097
2735	GLI1	GLI family zinc finger 1	-0.637848	1.02963	-3.14441	0.00196758	0.0473335
127253	TYW3	tRNA-yW synthesizing protein 3 homolog	-0.381774	4.09289	-3.14379	0.00197151	0.0473555
11101	ATE1	arginyltransferase 1	-0.347451	3.45082	-3.14138	0.00198688	0.0476517
400224	PLEKHD1	pleckstrin homology and coiled-coil domain containing D1	0.28282	0.223153	3.13984	0.00199679	0.0478162
2232	FDXR	ferredoxin reductase	-0.584832	4.02615	-3.1393	0.00200027	0.0478265
11320	MGAT4A	alpha-1,3-mannosyl-glycoprotein 4-beta-N-acetylglucosaminyltransferase A	0.954694	2.24788	3.13764	0.00201102	0.0480103
9317	PTER	phosphotriesterase related	-0.676149	3.06173	-3.13589	0.00202234	0.0482072
54465	ETAA1	ETAA1 activator of ATR kinase	-0.310288	3.20747	-3.13483	0.00202927	0.0482992
60558	GUF1	GUF1 homolog, GTPase	-0.299473	3.91088	-3.13353	0.0020378	0.0484286
9235	IL32	interleukin 32	-1.64044	3.68454	-3.13275	0.00204288	0.0484291
35	ACADS	acyl-CoA dehydrogenase short chain	-0.634488	2.92398	-3.13258	0.00204399	0.0484291
8767	RIPK2	receptor interacting serine/threonine kinase 2	-0.596937	3.99089	-3.13066	0.00205669	0.0486565
643246	MAP1LC3B2	microtubule associated protein 1 light chain 3 beta 2	-0.357088	1.28147	-3.12983	0.00206214	0.0487119
170958	ZNF525	zinc finger protein 525	0.700422	2.459	3.12913	0.0020668	0.0487485
90390	MED30	mediator complex subunit 30	-0.430206	4.51595	-3.12785	0.00207532	0.0488759
123099	DEGS2	delta 4-desaturase, sphingolipid 2	0.858687	0.956461	3.12722	0.00207953	0.0489018
57221	ARFGEF3	ARFGEF family member 3	0.707246	1.39147	3.12668	0.00208312	0.0489128
7757	ZNF208	zinc finger protein 208	0.389784	0.247219	3.12536	0.00209201	0.0489416
80764	THAP7	THAP domain containing 7	0.347335	4.59757	3.12522	0.00209293	0.0489416
164118	TTC24	tetratricopeptide repeat domain 24	-0.492652	0.443835	-3.12498	0.00209456	0.0489416
9278	ZBTB22	zinc finger and BTB domain containing 22	0.32104	3.26323	3.12464	0.00209685	0.0489416
85320	ABCC11	ATP binding cassette subfamily C member 11	0.573418	0.377324	3.12342	0.00210503	0.0489416
56985	ADPRM	ADP-ribose/CDP-alcohol diphosphatase, manganese dependent	-0.378836	2.85912	-3.1234	0.00210518	0.0489416
5328	PLAU	plasminogen activator, urokinase	-1.72053	4.20829	-3.12325	0.00210619	0.0489416
5891	MOK	MOK protein kinase	-0.852559	4.01969	-3.12192	0.00211519	0.0490781
23576	DDAH1	dimethylarginine dimethylaminohydrolase 1	0.835133	3.28527	3.12009	0.00212766	0.0492946
1152	CKB	creatine kinase B	1.17774	5.41235	3.11944	0.00213211	0.0493246
23384	SPECC1L	sperm antigen with calponin homology and coiled-coil domains 1 like	0.343691	3.92662	3.11854	0.00213826	0.0493888
58480	RHOU	ras homolog family member U	0.86297	1.56719	3.11812	0.00214118	0.0493888
55786	ZNF415	zinc finger protein 415	0.79997	1.15663	3.11645	0.00215264	0.0495802
22992	KDM2A	lysine demethylase 2A	0.388281	5.26507	3.11473	0.00216457	0.0497818
2920	CXCL2	C-X-C motif chemokine ligand 2	-1.03719	1.70771	-3.11382	0.00217088	0.0498173
121536	AEBP2	AE binding protein 2	-0.375685	4.03098	-3.11322	0.00217504	0.0498173
55601	DDX60	DExD/H-box helicase 60	-0.901441	2.21632	-3.1128	0.00217797	0.0498173
286257	PAXX	PAXX non-homologous end joining factor	0.401662	5.65367	3.11268	0.00217881	0.0498173
23160	WDR43	WD repeat domain 43	-0.338148	5.21321	-3.11126	0.0021887	0.0499706
