# Supplementary material for: Integrative Analyses Reveal the Anticancer Mechanisms and Sensitivity Markers of the Next-Generation Hypomethylating Agent NTX-301
Source: Cancers (Basel). 2023 Mar 13;15(6):1737. doi: 10.3390/cancers15061737 (PMC10046470; doi:10.3390/cancers15061737)
Supplement: Supplementary file 1 [file cancers-15-01737-s001.zip › Supplementary_Table_S3.xlsx]

## Sheet: Sheet1
Supple. Table S3. Differential methylation in promoter regions of responders versus nonresponders
Methylation region	Mean methylation sensitive	Mean methylation resistant	Coefficient	p Value	FDR
COL18A1_21_46874423_46875423	0.564727	0.257075	-1.21069	8.76423e-08	0.00128001
C9orf170_9_89762558_89763558	0.531856	0.18321	-1.16593	1.32397e-07	0.00128001
ZNF525_19_53867967_53868967	0.366341	0.10307	-1.33418	1.90175e-07	0.00128001
MIR6072_10_2118283_2119283	0.721919	0.372782	-1.33297	4.93241e-07	0.00218399
ATP2C2_16_84401128_84402128	0.348014	0.0632246	-1.17028	5.40806e-07	0.00218399
SF3A3_1_38455782_38456782	0.14952	0.0671123	-0.912097	7.55047e-07	0.00229446
PNPLA6_19_7598037_7599037	0.72902	0.395396	-1.07965	8.8972e-07	0.00229446
DNA2_10_70231878_70232878	0.427033	0.273904	-1.11501	9.4592e-07	0.00229446
PRKCH_14_61787160_61788160	0.543485	0.226277	-1.18277	1.39685e-06	0.00229446
RALYL_8_85094452_85095452	0.566501	0.232924	-1.25874	1.45537e-06	0.00229446
RALYL_8_85094585_85095585	0.566501	0.232924	-1.25874	1.45537e-06	0.00229446
TBPL2_14_55907263_55908263	0.912888	0.788017	-1.08666	1.58886e-06	0.00229446
KCNJ3_2_155554092_155555092	0.482794	0.14539	-1.2219	1.67282e-06	0.00229446
NR4A2_2_157189287_157190287	0.100811	0.0287966	-1.2219	1.67282e-06	0.00229446
LOC100996437_7_66118505_66119505	0.0874662	0.0605706	-0.911347	1.70448e-06	0.00229446
COL1A2_7_94022872_94023872	0.685945	0.450636	-1.28292	1.84687e-06	0.00233075
RANGRF_17_8190968_8191968	0.0949002	0.0599372	-0.873848	2.18548e-06	0.00259584
SSR4P1_21_46493126_46494126	0.248802	0.126122	-0.912003	2.73772e-06	0.00307111
CDSN_6_31088252_31089252	0.742045	0.482755	-1.22192	3.09e-06	0.00328385
NXPH1_7_8472584_8473584	0.549041	0.234623	-1.17845	3.53603e-06	0.00356997
TEX264_3_51704289_51705289	0.0695613	0.0323761	-0.965901	3.97905e-06	0.00370799
RSL1D1_16_11945442_11946442	0.0746857	0.02895	-0.975088	4.13666e-06	0.00370799
DNA2_10_70231730_70232730	0.132598	0.0733476	-0.874249	4.28121e-06	0.00370799
CERS4_19_8273216_8274216	0.271477	0.140897	-0.968343	4.61043e-06	0.00370799
KLHL38_8_124665190_124666190	0.646722	0.334808	-1.24954	4.80614e-06	0.00370799
NAPA-AS1_19_47986538_47987538	0.234366	0.150168	-0.632127	4.89212e-06	0.00370799
PNPLA6_19_7598127_7599127	0.623884	0.343507	-0.95055	4.95819e-06	0.00370799
NDUFS2_1_161168104_161169104	0.608878	0.317424	-0.974298	6.07789e-06	0.00433155
NIPSNAP1_22_29977085_29978085	0.379162	0.17014	-1.00439	6.22103e-06	0.00433155
POLR1E_9_37484931_37485931	0.321313	0.225293	-0.726161	7.22708e-06	0.00481217
MYHAS_17_10285448_10286448	0.769228	0.418514	-1.28213	7.50541e-06	0.00481217
NIPSNAP1_22_29977326_29978326	0.726634	0.325531	-1.24656	7.77218e-06	0.00481217
PLPP4_10_122215465_122216465	0.48543	0.197317	-1.04803	8.03634e-06	0.00481217
FAM127C_X_134156566_134157566	0.488875	0.131131	-1.17704	8.1029e-06	0.00481217
FFAR2_19_35939616_35940616	0.47877	0.22149	-1.2814	8.62214e-06	0.00497423
MRPL58_17_73007758_73008758	0.152927	0.0270502	-0.849916	9.21596e-06	0.00516913
SOX17_8_55369494_55370494	0.679186	0.352298	-1.19257	1.06082e-05	0.00575248
BACE1_11_117186972_117187972	0.463019	0.2433	-1.04423	1.10371e-05	0.00575248
KCNG1_20_49639675_49640675	0.528928	0.256034	-0.978921	1.11107e-05	0.00575248
PID1_2_230136057_230137057	0.424955	0.181813	-1.00689	1.2353e-05	0.00608437
TDRD5_1_179559988_179560988	0.63892	0.21463	-1.15482	1.23544e-05	0.00608437
LGALS8_1_236686026_236687026	0.587515	0.260026	-1.13257	1.33405e-05	0.00641361
MATN2_8_98880248_98881248	0.443974	0.197824	-0.889519	1.70789e-05	0.00801995
COL14A1_8_121136346_121137346	0.602894	0.245424	-1.23085	1.88069e-05	0.00863067
GLP2R_17_9727867_9728867	0.728513	0.413713	-1.16852	2.12241e-05	0.00952351
PRR18_6_166721871_166722871	0.521008	0.247114	-1.07838	2.40942e-05	0.0103413
LRPAP1_4_3533876_3534876	0.234043	0.084023	-0.839252	2.42483e-05	0.0103413
RFX6_6_117197375_117198375	0.525937	0.167582	-1.02178	2.45831e-05	0.0103413
ZNF880_19_52872169_52873169	0.559813	0.221586	-1.04809	2.58293e-05	0.0106438
CALCA_11_14993832_14994832	0.484348	0.222144	-1.1329	2.93268e-05	0.0114765
RGS4_1_163037763_163038763	0.802934	0.563004	-1.13507	2.98798e-05	0.0114765
RGS4_1_163038043_163039043	0.802934	0.563004	-1.13507	2.98798e-05	0.0114765
ZIC3_X_136647345_136648345	0.725122	0.407701	-1.08182	3.01236e-05	0.0114765
SLC22A2_6_160679963_160680963	0.718462	0.455296	-1.25412	3.16234e-05	0.0116752
HOXB8_17_46692301_46693301	0.655606	0.36566	-1.31836	3.18014e-05	0.0116752
WNT3A_1_228193722_228194722	0.561585	0.251009	-1.07859	3.32008e-05	0.0119713
LRPAP1_4_3534224_3535224	0.360197	0.126024	-0.888757	3.39509e-05	0.0120269
ITM2C_2_231728609_231729609	0.232232	0.088705	-0.940062	3.63416e-05	0.012125
SLC9A3R1_17_72743750_72744750	0.123898	0.0922046	-0.841721	3.6679e-05	0.012125
CCDC185_1_223565714_223566714	0.548126	0.215299	-1.13809	3.77682e-05	0.012125
GDNF_5_37835929_37836929	0.787458	0.556738	-0.990524	3.79752e-05	0.012125
HTR1B_6_78173739_78174739	0.615911	0.295214	-1.23509	3.79807e-05	0.012125
ETNPPL_4_109684235_109685235	0.614069	0.297349	-0.907839	3.85748e-05	0.012125
VDAC2_10_76968911_76969911	0.17895	0.124517	-0.743698	3.89458e-05	0.012125
TFAP2A_6_10415470_10416470	0.669021	0.338304	-1.10632	3.90315e-05	0.012125
AK1_9_130640022_130641022	0.730104	0.463421	-1.13849	4.22789e-05	0.0129348
SNED1_2_241937254_241938254	0.407849	0.105314	-0.91323	4.36086e-05	0.0131383
SCAP_3_47517449_47518449	0.338345	0.220974	-0.616545	4.46331e-05	0.0131383
SYT13_11_45307884_45308884	0.527681	0.223328	-1.02324	4.55071e-05	0.0131383
PLEKHG5_1_6580121_6581121	0.662986	0.357786	-1.31322	4.5547e-05	0.0131383
CLK4_5_178054054_178055054	0.176507	0.0791172	-0.758119	4.89534e-05	0.0139221
COL24A1_1_86622121_86623121	0.736968	0.466445	-1.01262	5.0436e-05	0.0139323
ZFP41_8_144327990_144328990	0.326542	0.249729	-0.656026	5.17061e-05	0.0139323
MIR3615_17_72743751_72744751	0.117017	0.0888772	-0.822898	5.27352e-05	0.0139323
UHMK1_1_162466594_162467594	0.68874	0.423394	-0.961221	5.28856e-05	0.0139323
H19_11_2019105_2020105	0.367816	0.213648	-1.01945	5.29624e-05	0.0139323
SNORD115-10_15_25431682_25432682	0.574267	0.354242	-1.01744	5.31294e-05	0.0139323
GAL_11_68450942_68451942	0.711755	0.501232	-0.672582	5.66488e-05	0.0144484
STEAP1B_7_22539901_22540901	0.515771	0.230912	-1.13829	5.69493e-05	0.0144484
STMND1_6_17101488_17102488	0.491913	0.175174	-0.972598	5.7244e-05	0.0144484
GTF2A2_15_59949737_59950737	0.264972	0.120695	-0.876816	5.92505e-05	0.014584
LOC100129940_12_66275947_66276947	0.773731	0.640815	-1.09782	5.95874e-05	0.014584
LOC101929384_12_311810_312810	0.696704	0.321313	-1.08986	5.9948e-05	0.014584
MAPT-AS1_17_43972879_43973879	0.51643	0.243187	-0.94326	6.60232e-05	0.0156996
SHC2_19_460996_461996	0.362012	0.111027	-0.842961	6.62621e-05	0.0156996
LOC105371998_18_12431772_12432772	0.944621	0.914268	-0.916927	6.70154e-05	0.0156996
SEPT9_17_75446325_75447325	0.402546	0.33625	-1.15091	7.11117e-05	0.0156996
LOC375196_2_39187485_39188485	0.865602	0.604364	-0.939707	7.17381e-05	0.0156996
ZNF790_19_37329286_37330286	0.427994	0.11136	-1.00063	7.26541e-05	0.0156996
ACSL6_5_131347607_131348607	0.37669	0.12125	-0.947856	7.30629e-05	0.0156996
KCNK4_11_64058481_64059481	0.561519	0.30213	-0.865684	7.31575e-05	0.0156996
SNORD115-11_15_25467392_25468392	0.6693	0.350503	-1.11157	7.38642e-05	0.0156996
SNORD115-29_15_25467392_25468392	0.6693	0.350503	-1.11157	7.38642e-05	0.0156996
SNORD115-36_15_25467392_25468392	0.6693	0.350503	-1.11157	7.38642e-05	0.0156996
SNORD115-43_15_25467392_25468392	0.6693	0.350503	-1.11157	7.38642e-05	0.0156996
LOC101929122_6_159591039_159592039	0.475648	0.178404	-1.04346	7.50777e-05	0.0157913
CDH4_20_60073476_60074476	0.595203	0.278895	-1.15423	7.6023e-05	0.0158253
SLC7A10_19_33716756_33717756	0.542359	0.244097	-0.890909	7.94298e-05	0.0162429
ZNF790_19_37328929_37329929	0.422354	0.0988602	-0.988285	8.16096e-05	0.0162429
GPRC5B_16_19896233_19897233	0.545434	0.341925	-0.764935	8.29282e-05	0.0162429
DPY19L2P4_7_89747713_89748713	0.633339	0.324272	-0.963087	8.30548e-05	0.0162429
SLC5A3_21_35444822_35445822	0.197	0.0560894	-0.853029	8.32769e-05	0.0162429
MRPS6_21_35444822_35445822	0.197	0.0560894	-0.853029	8.32769e-05	0.0162429
TIGD7_16_3355439_3356439	0.30038	0.0938664	-0.94171	8.42593e-05	0.0162429
MEOX2_7_15726308_15727308	0.770669	0.490842	-1.11892	8.44645e-05	0.0162429
ABCC8_11_17498392_17499392	0.469672	0.2711	-1.04761	8.56701e-05	0.0163194
MSX2_5_174150574_174151574	0.483198	0.212459	-0.866587	8.77472e-05	0.0163528
HAND2_4_174451378_174452378	0.627413	0.378034	-0.975516	8.85484e-05	0.0163528
NGF_1_115880857_115881857	0.723409	0.479668	-0.857716	8.93828e-05	0.0163528
MED30_8_118531951_118532951	0.0958666	0.0344893	-0.818165	8.96614e-05	0.0163528
SYT9_11_7272180_7273180	0.600423	0.266016	-1.02299	8.99387e-05	0.0163528
ZNF610_19_52838497_52839497	0.539931	0.246373	-0.962708	9.07052e-05	0.0163528
GTF2A2_15_59949740_59950740	0.296241	0.127638	-0.879341	9.2096e-05	0.0163732
MED31_17_6554954_6555954	0.263402	0.0940704	-0.82269	9.25621e-05	0.0163732
MIR3147_7_57471730_57472730	0.698926	0.316212	-1.11217	9.40316e-05	0.0163732
DNAJC5_20_62525454_62526454	0.170358	0.065723	-0.693718	9.45287e-05	0.0163732
FGF12-AS3_3_192231810_192232810	0.707114	0.371262	-1.01004	9.48727e-05	0.0163732
MCMDC2_8_67782736_67783736	0.45809	0.138182	-1.05388	9.90297e-05	0.0169349
HSPA4L_4_128702363_128703363	0.310866	0.0549064	-0.920716	9.98048e-05	0.0169349
KCNA7_19_49576198_49577198	0.681975	0.420507	-0.987454	0.000101496	0.0170785
PSMD4_1_151226196_151227196	0.384917	0.174573	-0.912378	0.000103151	0.0171732
ODF2_9_131217284_131218284	0.242098	0.159016	-0.585473	0.000103761	0.0171732
MAP6_11_75379479_75380479	0.498995	0.217978	-1.06338	0.000107562	0.0176576
TOP3A_17_18218406_18219406	0.148626	0.0645515	-0.724372	0.000109486	0.0177265
GLS2_12_56882198_56883198	0.66199	0.389408	-0.842018	0.000109737	0.0177265
FGF8_10_103535759_103536759	0.588214	0.301448	-0.871714	0.000114075	0.0181471
INPP4A_2_99060320_99061320	0.0200177	0.00833174	-0.786379	0.000114138	0.0181471
DNAJB6_7_157128709_157129709	0.234113	0.0730791	-0.869689	0.000116609	0.0182525
DNAJB6_7_157128710_157129710	0.234113	0.0730791	-0.869689	0.000116609	0.0182525
VSTM5_11_93583668_93584668	0.613424	0.32809	-0.982194	0.000120721	0.0187508
C6orf203_6_107348375_107349375	0.177721	0.128405	-0.615291	0.000125566	0.0193545
CEP131_17_79196789_79197789	0.191959	0.093744	-0.758939	0.000131185	0.0199281
TP73_1_3613609_3614609	0.821835	0.579563	-1.20048	0.000131262	0.0199281
IRS4_X_107979607_107980607	0.482834	0.140076	-0.983677	0.000134662	0.0202917
AP3B2_15_83378660_83379660	0.442157	0.280988	-1.0219	0.000142467	0.0213089
LOC105374344_4_1106426_1107426	0.654252	0.384081	-1.00462	0.000147212	0.0215756
MIR543_14_101497323_101498323	0.730523	0.508031	-1.02558	0.000149026	0.0215756
PDE4B_1_66257855_66258855	0.630008	0.339446	-0.904031	0.000149201	0.0215756
SLC6A4_17_28562986_28563986	0.539541	0.282648	-0.893987	0.000149244	0.0215756
NDUFA4L2_12_57634475_57635475	0.284142	0.165405	-0.77568	0.000151123	0.0215756
YBX2_17_7197876_7198876	0.390805	0.159405	-0.886864	0.000151893	0.0215756
RSPH1_21_43916464_43917464	0.0434034	0.0233011	-0.735606	0.000153746	0.0215756
SOX14_3_137482133_137483133	0.467866	0.165871	-0.891151	0.00015528	0.0215756
GLRA1_5_151304397_151305397	0.435638	0.232319	-0.967525	0.000155471	0.0215756
MSRB3_12_65671422_65672422	0.500249	0.242361	-0.788687	0.000155656	0.0215756
MGRN1_16_4673824_4674824	0.0496023	0.0352691	-0.660616	0.000156004	0.0215756
LOC389895_X_139172825_139173825	0.603929	0.326265	-1.03281	0.000161182	0.0221401
FN3K_17_80692451_80693451	0.49514	0.123686	-0.85665	0.000163166	0.0222612
PLEKHA2_8_38757752_38758752	0.282032	0.249223	-0.696731	0.000164851	0.0223401
POC1A_3_52188706_52189706	0.107265	0.0680328	-0.759241	0.000166864	0.0224622
PLEKHG5_1_6545529_6546529	0.551087	0.222928	-1.06801	0.000173199	0.0231605
MARVELD3_16_71659055_71660055	0.428042	0.0832285	-1.01391	0.000175336	0.0232673
KLHL35_11_75141674_75142674	0.646326	0.396316	-0.860591	0.000176302	0.0232673
ADGRA1-AS1_10_134900201_134901201	0.498434	0.1683	-1.05432	0.000184043	0.0241312
MIR1229_5_179225346_179226346	0.965737	0.938667	-0.639603	0.000189731	0.0247164
CMYA5_5_78984658_78985658	0.815121	0.474322	-0.986802	0.00019358	0.0250561
ZFR_5_32444844_32445844	0.55574	0.385002	-0.832573	0.000196383	0.0252571
C10orf53_10_50886683_50887683	0.543023	0.243418	-0.975107	0.000201115	0.0255127
FOXB1_15_60295420_60296420	0.54661	0.30579	-0.936622	0.000201568	0.0255127
OPRD1_1_29137653_29138653	0.452698	0.136341	-0.955069	0.000202767	0.0255127
FLG-AS1_1_152284934_152285934	0.727455	0.402857	-1.09392	0.000206003	0.0255127
SNTG1_8_50823232_50824232	0.540606	0.258343	-1.00272	0.000206396	0.0255127
BACH1_21_30670115_30671115	0.20488	0.150834	-0.752456	0.000206824	0.0255127
AGBL4_1_50489626_50490626	0.51073	0.154505	-0.956498	0.000207215	0.0255127
HOTAIR_12_54368740_54369740	0.558595	0.304875	-0.973585	0.000210283	0.0257109
CHST8_19_34111872_34112872	0.639538	0.338164	-0.890365	0.000211371	0.0257109
POFUT2_21_46707811_46708811	0.0983834	0.0394479	-0.664242	0.000214191	0.0257847
FAM83G_17_18908060_18909060	0.449387	0.284932	-0.729588	0.000214532	0.0257847
GALNT11_7_151721758_151722758	0.344477	0.052	-0.855618	0.000218715	0.0261319
YEATS4_12_69752489_69753489	0.712777	0.35178	-1.25326	0.000220346	0.0261719
PCDH19_X_99665271_99666271	0.622197	0.325969	-0.925946	0.000225748	0.0266568
PEX11A_15_90234015_90235015	0.204905	0.0479628	-0.844276	0.000228344	0.0268065
P2RX2_12_133194365_133195365	0.63232	0.270588	-1.16447	0.000234189	0.0273337
NPB_17_79858984_79859984	0.660708	0.407876	-1.00848	0.000236429	0.0274366
HOXB-AS3_17_46668653_46669653	0.933869	0.672541	-1.04839	0.000242027	0.0279258
CHST8_19_34111860_34112860	0.639736	0.340469	-0.8815	0.000244985	0.028047
LINC00473_6_166401527_166402527	0.434295	0.216284	-0.831291	0.000245856	0.028047
GINS2_16_85722588_85723588	0.294957	0.196949	-0.628606	0.000253521	0.0286668
PLEKHD1_14_69950470_69951470	0.460814	0.119413	-0.883131	0.000254128	0.0286668
RHOXF1P1_X_119149508_119150508	0.531222	0.208857	-0.915286	0.000256621	0.0287872
CYP20A1_2_204102163_204103163	0.765471	0.525198	-1.07769	0.00025909	0.0289035
EXOC3_5_442333_443333	0.191517	0.0616791	-0.72525	0.000260812	0.0289358
PPP1R13B_14_104313927_104314927	0.231184	0.0916389	-0.677859	0.000264254	0.0291575
CKMT2_5_80528138_80529138	0.882256	0.74473	-0.836789	0.000274825	0.0301591
ISM2_14_77965210_77966210	0.378104	0.158989	-0.876499	0.000279421	0.0303671
AMZ1_7_2726835_2727835	0.424074	0.15931	-0.925864	0.000279729	0.0303671
LOC100287846_8_48099929_48100929	0.41702	0.131768	-0.88575	0.000282786	0.0303683
PSTPIP2_18_43652250_43653250	0.53518	0.273132	-0.817249	0.000283335	0.0303683
CA3_8_86350055_86351055	0.718474	0.47875	-0.930527	0.000284743	0.0303683
CCDC170_6_151814174_151815174	0.506733	0.202373	-0.901219	0.000285755	0.0303683
MARK3_14_103850700_103851700	0.0856013	0.0199609	-0.757548	0.000290669	0.0305961
RBM46_4_155701656_155702656	0.762784	0.548064	-0.769613	0.000294153	0.0305961
OS9_12_58086737_58087737	0.444729	0.247558	-0.949701	0.000294539	0.0305961
STAG3_7_99774346_99775346	0.0275062	0.0141664	-0.71259	0.000296091	0.0305961
STAG3_7_99774365_99775365	0.0275062	0.0141664	-0.71259	0.000296091	0.0305961
TPRG1L_1_3540555_3541555	0.0587536	0.0104072	-0.774212	0.000296991	0.0305961
MLX_17_40718077_40719077	0.272559	0.188787	-0.700385	0.000302294	0.0309843
TSNARE1_8_143484610_143485610	0.168617	0.0541015	-0.742363	0.000306021	0.0311818
NUMA1_11_71791520_71792520	0.0952902	0.0637802	-0.751682	0.000307309	0.0311818
MYO3A_10_26222001_26223001	0.633488	0.366409	-0.983345	0.000309916	0.0312891
LRRC43_12_122666666_122667666	0.571887	0.388004	-0.827799	0.00031325	0.0313641
PHKG1_7_56160689_56161689	0.615695	0.339245	-0.847876	0.000313765	0.0313641
WNT9B_17_44927951_44928951	0.473168	0.194911	-0.735143	0.000317524	0.0315835
TGM6_20_2360553_2361553	0.89472	0.62902	-1.17404	0.000325495	0.0321138
MYOD1_11_17740109_17741109	0.574156	0.244693	-0.9266	0.00032716	0.0321138
USE1_19_17325154_17326154	0.137681	0.094387	-0.671541	0.000327627	0.0321138
XBP1_22_29196560_29197560	0.0343045	0.0166504	-0.67402	0.000333787	0.0325595
PLEC_8_145050913_145051913	0.0568589	0.0393174	-0.645861	0.000335945	0.0326125
HAP1_17_39890898_39891898	0.30014	0.0818721	-0.806495	0.000340011	0.0326222
ZNF423_16_49891830_49892830	0.231	0.0588872	-0.81301	0.000340706	0.0326222
SLC5A8_12_101604016_101605016	0.58125	0.272981	-0.965723	0.000340892	0.0326222
HCN2_19_588892_589892	0.381536	0.163212	-0.807561	0.000348126	0.0329919
LINGO1_15_78113242_78114242	0.56027	0.318227	-0.943426	0.000349255	0.0329919
MFSD6L_17_8702667_8703667	0.610962	0.278631	-1.0046	0.000350494	0.0329919
NTN1_17_8923858_8924858	0.143963	0.0438982	-0.818199	0.00035129	0.0329919
KIF1C_17_4900242_4901242	0.0571266	0.0212534	-0.713758	0.000356649	0.0333323
TMEM151A_11_66058372_66059372	0.472996	0.21244	-0.960448	0.000358217	0.0333323
MIR3195_20_60638857_60639857	0.694694	0.422194	-0.85822	0.000360479	0.0333581
LINC00028_20_30072580_30073580	0.640824	0.419628	-0.900594	0.000361798	0.0333581
AGPAT4-IT1_6_161583014_161584014	0.892294	0.7534	-0.858671	0.000366095	0.0336009
LHFPL3_7_103968103_103969103	0.560818	0.305237	-0.848999	0.000372215	0.0337593
C1orf159_1_1051736_1052736	0.166281	0.0617753	-0.695893	0.000372274	0.0337593
RSPO2_8_109094167_109095167	0.571964	0.316335	-0.815626	0.000372837	0.0337593
MIR1185-2_14_101509534_101510534	0.712901	0.416819	-1.06684	0.000378397	0.0341098
CTU2_16_88771870_88772870	0.0115491	0.00573532	-0.746799	0.000382817	0.0343153
PLEKHG6_12_6419098_6420098	0.587003	0.297213	-0.829301	0.000384076	0.0343153
USP50_15_50838902_50839902	0.60905	0.393218	-1.10463	0.00038606	0.0343407
PDSS2_6_107780779_107781779	0.132512	0.0732781	-0.714713	0.000390318	0.0345518
ULBP2_6_150262073_150263073	0.349859	0.175145	-0.780321	0.000393224	0.0345518
CLPB_11_72145728_72146728	0.300077	0.234747	-0.568548	0.000394348	0.0345518
TMEM215_9_32782496_32783496	0.645833	0.379088	-0.802974	0.000395279	0.0345518
LHX2_9_126772888_126773888	0.511539	0.206971	-0.861091	0.000401251	0.034809
MSI1_12_120806983_120807983	0.313493	0.0727998	-0.8808	0.000401668	0.034809
FNIP1_5_131132756_131133756	0.0772051	0.0122419	-0.755989	0.000404434	0.0348661
DYNLRB2_16_80573630_80574630	0.32143	0.117064	-0.927502	0.000405782	0.0348661
PTPRT_20_41818557_41819557	0.602386	0.283324	-0.898147	0.000409448	0.0350321
ST14_11_130028681_130029681	0.541749	0.39919	-0.755908	0.000414571	0.0352411
MRAS_3_138066969_138067969	0.331537	0.0336483	-0.804535	0.000415382	0.0352411
PPL_16_4987136_4988136	0.428962	0.21415	-0.794588	0.000419901	0.0354755
ULK2_17_19771239_19772239	0.518412	0.180845	-0.873355	0.000427047	0.0356853
COL12A1_6_75915623_75916623	0.493779	0.228412	-0.772626	0.000427599	0.0356853
MSRB3_12_65671766_65672766	0.358545	0.122137	-0.744067	0.000427687	0.0356853
GREB1_2_11679079_11680079	0.621079	0.376744	-0.99856	0.000431371	0.0358158
DBX2_12_45444882_45445882	0.586788	0.297874	-0.918105	0.000432798	0.0358158
KCNQ1_11_2465220_2466220	0.503559	0.268373	-0.820718	0.000437176	0.0360215
UBE2F_2_238874586_238875586	0.123414	0.0350383	-0.750563	0.000441473	0.0360215
UBE2F-SCLY_2_238874586_238875586	0.123414	0.0350383	-0.750563	0.000441473	0.0360215
DPP6_7_154001296_154002296	0.731925	0.416099	-0.891002	0.000442419	0.0360215
DBX1_11_20181870_20182870	0.748156	0.491087	-0.854413	0.000448315	0.0363549
IL10RB_21_34637664_34638664	0.204605	0.120649	-0.672169	0.000451227	0.0364447
ZNF805_19_57751052_57752052	0.262223	0.13648	-0.753808	0.000457942	0.0368397
HAGH_16_1877195_1878195	0.226003	0.0327564	-0.767943	0.000464453	0.0372152
GNA12_7_2802774_2803774	0.85978	0.592581	-0.892518	0.000466865	0.0372607
ANO5_11_22213721_22214721	0.491567	0.174146	-0.892519	0.00046898	0.0372668
STK25_2_242447775_242448775	0.14448	0.0605087	-0.64385	0.000470634	0.0372668
SIGIRR_11_417397_418397	0.414653	0.126771	-0.902931	0.000473728	0.0373608
DPPA2_3_109035364_109036364	0.699694	0.451946	-0.86343	0.000475521	0.0373608
CTNS_17_3538761_3539761	0.09748	0.0452572	-0.648535	0.000478222	0.0373775
ZNF232_17_5026337_5027337	0.700095	0.411987	-0.9374	0.000479436	0.0373775
GNAS_20_57465357_57466357	0.211332	0.155319	-0.638934	0.000486519	0.0377838
BCL7A_12_122458791_122459791	0.269391	0.223672	-0.68422	0.000499496	0.038643
LOC283683_15_23115254_23116254	0.619591	0.339216	-0.986064	0.000501702	0.0386656
MEF2B_19_19281098_19282098	0.385251	0.208843	-0.950691	0.0005119	0.0392895
GRP_18_56886399_56887399	0.598571	0.32588	-0.838614	0.000513938	0.0392895
DKC1_X_153990016_153991016	0.236423	0.0928546	-0.820987	0.000515889	0.0392895
LOC105372419_19_45593649_45594649	0.800562	0.54742	-1.11588	0.000517582	0.0392895
ZFP41_8_144328097_144329097	0.26058	0.208475	-0.5628	0.000520499	0.0392933
ARL6IP4_12_123463606_123464606	0.694903	0.506212	-0.969017	0.000521523	0.0392933
LINC01600_6_2634837_2635837	0.173187	0.113574	-0.825272	0.000524016	0.0393159
NR5A2_1_200010952_200011952	0.509951	0.310229	-0.852332	0.000525718	0.0393159
THSD7A_7_11871824_11872824	0.602737	0.377534	-0.909023	0.000528857	0.0393653
LOC150051_21_32930557_32931557	0.264656	0.0710662	-0.88229	0.000532903	0.0393653
NKX2-3_10_101291689_101292689	0.539684	0.366239	-0.82156	0.000532924	0.0393653
SFMBT2_10_7453448_7454448	0.623197	0.345477	-0.882982	0.000534177	0.0393653
HRAS_11_535567_536567	0.0360468	0.0176213	-0.740875	0.000543641	0.0399171
TAC1_7_97360270_97361270	0.624663	0.392436	-1.00797	0.00055214	0.0403942
CGN_1_151482861_151483861	0.0970315	0.0585996	-0.697658	0.000554852	0.0404356
VAMP1_12_6580065_6581065	0.138879	0.120833	-0.783034	0.000558723	0.0404356
STEAP1_7_89782688_89783688	0.335665	0.0904756	-0.873955	0.000559229	0.0404356
SLIT3_5_168728133_168729133	0.662434	0.383333	-0.909899	0.000561106	0.0404356
BRINP2_1_177139523_177140523	0.599784	0.267892	-0.894425	0.000563103	0.0404356
ZIM2-AS1_19_57275689_57276689	0.661564	0.345034	-0.942987	0.000564721	0.0404356
ITIH4_3_52864717_52865717	0.745062	0.847595	0.961008	0.000587622	0.0416752
RASSF2_20_4804291_4805291	0.398817	0.304956	-0.706983	0.000596451	0.0416752
RAD9A_11_67159775_67160775	0.260357	0.13203	-0.666051	0.000596601	0.0416752
PIEZO2_18_11148761_11149761	0.639925	0.387949	-0.918692	0.000597513	0.0416752
ZNF75A_16_3355211_3356211	0.339425	0.11525	-0.787617	0.000598603	0.0416752
RPUSD3_3_9885702_9886702	0.413753	0.260709	-0.580502	0.000598862	0.0416752
TAF9B_X_77395179_77396179	0.294987	0.111854	-0.756244	0.000599553	0.0416752
LOC101928174_15_35046284_35047284	0.650095	0.385846	-0.827216	0.00059991	0.0416752
HOXD4_2_177015112_177016112	0.836479	0.688963	-0.925908	0.000600626	0.0416752
RRP15_1_218457628_218458628	0.5091	0.173768	-0.981141	0.000604573	0.0416752
TJP1_15_30114706_30115706	0.375792	0.0377517	-0.801623	0.000605088	0.0416752
TCEAL2_X_101379659_101380659	0.586996	0.304401	-0.895294	0.000607336	0.0416752
PICK1_22_38452261_38453261	0.65495	0.507355	-0.970427	0.000609219	0.0416752
C14orf79_14_105451615_105452615	0.0376702	0.00794255	-0.716785	0.000610929	0.0416752
TBX20_7_35293711_35294711	0.700129	0.443281	-0.880538	0.000613939	0.0417396
SPTBN4_19_41035394_41036394	0.357408	0.170906	-0.928428	0.000619217	0.0418653
MCFD2_2_47143251_47144251	0.247922	0.147403	-0.660399	0.000619935	0.0418653
PCSK4_19_1490449_1491449	0.0672381	0.0141057	-0.688331	0.000625124	0.042075
AGO4_1_36272827_36273827	0.152991	0.0392804	-0.690349	0.000630075	0.0422673
PDE4B_1_66257192_66258192	0.562032	0.346631	-0.823447	0.000652546	0.0435542
SLC35D3_6_137242378_137243378	0.410784	0.115836	-0.886138	0.000654259	0.0435542
STK25_2_242448110_242449110	0.25404	0.105908	-0.633972	0.000655728	0.0435542
ZNF512B_20_62601223_62602223	0.363984	0.124472	-0.751182	0.000660371	0.0436602
FEZ1_11_125366206_125367206	0.805136	0.614683	-0.848518	0.00066244	0.0436602
DNAJC17_15_41099676_41100676	0.0429483	0.0359845	-0.73648	0.000663812	0.0436602
MIR496_14_101525909_101526909	0.806508	0.580038	-1.01991	0.000674837	0.0442412
SSTR2_17_71160159_71161159	0.250749	0.082297	-0.82708	0.000684638	0.0447386
LOC643355_1_112532189_112533189	0.281007	0.0454498	-0.762447	0.000692802	0.045126
CC2D1A_19_14015955_14016955	0.447909	0.291918	-0.594472	0.00069848	0.0452591
B3GALT5_21_40983866_40984866	0.55732	0.277275	-0.747768	0.000701615	0.0452591
ACSL6_5_131347761_131348761	0.362233	0.142823	-0.831947	0.000701793	0.0452591
NANOS1_10_120788227_120789227	0.196282	0.123645	-0.688943	0.000705832	0.0452591
R3HDM4_19_913225_914225	0.0599662	0.0175145	-0.752758	0.000706053	0.0452591
NPBWR1_8_53851467_53852467	0.714201	0.446358	-0.950002	0.000712613	0.045535
RASGEF1A_10_43762367_43763367	0.54508	0.242753	-0.886855	0.000726578	0.046281
IZUMO4_19_2095867_2096867	0.030836	0.0211319	-0.678025	0.000732954	0.0464594
TMEM132E_17_32906767_32907767	0.462378	0.149743	-0.852159	0.00073398	0.0464594
PROKR1_2_68869719_68870719	0.440376	0.082652	-0.865757	0.000743799	0.0469337
TEX28_X_153523454_153524454	0.938698	0.82889	-0.754956	0.000748588	0.0470888
OVOL1_11_65553504_65554504	0.54029	0.299951	-0.704312	0.00075699	0.0473703
LRCOL1_12_133187037_133188037	0.621936	0.43392	-0.789231	0.000759964	0.0473703
SBK1_16_28302839_28303839	0.0420238	0.025454	-0.654409	0.000762338	0.0473703
DRD2_11_113346001_113347001	0.447967	0.161886	-0.841351	0.000764315	0.0473703
GJD2_15_35046782_35047782	0.594845	0.315089	-0.849886	0.000764793	0.0473703
GPRC5B_16_19896956_19897956	0.754014	0.546077	-0.769185	0.000769077	0.0474899
FAM3A_X_153744566_153745566	0.381721	0.299173	-0.897723	0.000779216	0.0477847
FOXB2_9_79633570_79634570	0.660394	0.420349	-0.865836	0.00078095	0.0477847
VPS13A_9_79791360_79792360	0.0210941	0.00782122	-0.865836	0.00078095	0.0477847
RAMP3_7_45196366_45197366	0.460518	0.287769	-0.739376	0.000788107	0.0479982
SOWAHD_X_118891575_118892575	0.304198	0.105923	-0.748519	0.000789194	0.0479982
ALDH1A2_15_58358121_58359121	0.582968	0.314266	-0.836908	0.000792051	0.0480273
IQCC_1_32670235_32671235	0.396854	0.125223	-0.966184	0.000795443	0.0480886
CBX4_17_77813213_77814213	0.130856	0.0681564	-0.562129	0.000798461	0.0481269
MIR3621_9_140063722_140064722	0.182242	0.0486811	-0.720881	0.000805719	0.0484199
LOC105371458_1_157894756_157895756	0.763746	0.509639	-0.957237	0.000812411	0.0486182
PROK2_3_71834357_71835357	0.453349	0.211597	-0.927486	0.000814017	0.0486182
CELSR3-AS1_3_48700200_48701200	0.298176	0.0527917	-0.809179	0.000816242	0.0486182
GLB1L_2_220108353_220109353	0.610913	0.458149	-0.838185	0.000822744	0.0488001
FOXCUT_6_1604765_1605765	0.48596	0.29925	-0.693793	0.000824129	0.0488001
CCND2_12_4381901_4382901	0.295039	0.158008	-0.817302	0.00082912	0.0489368
SSTR5_16_1127780_1128780	0.507197	0.203633	-0.678991	0.000832128	0.0489368
PRIMA1_14_94254766_94255766	0.431429	0.09734	-0.798144	0.000834416	0.0489368
DACH2_X_85402454_85403454	0.551584	0.207297	-0.890774	0.000836133	0.0489368
C1orf228_1_45139393_45140393	0.0735443	0.0263079	-0.69555	0.000842462	0.0491647
PREB_2_27357542_27358542	0.232024	0.183146	-0.724686	0.000851341	0.0493358
MKX_10_28034778_28035778	0.69155	0.383481	-0.935287	0.000851899	0.0493358
SLC19A1_21_46962385_46963385	0.30084	0.195397	-0.545637	0.000854964	0.0493358
MLXIPL_7_73038870_73039870	0.389058	0.158965	-0.730028	0.00085761	0.0493358
MLXIPL_7_73038873_73039873	0.389058	0.158965	-0.730028	0.00085761	0.0493358
RBP4_10_95360993_95361993	0.478959	0.165428	-0.932783	0.000865383	0.0496415
